# Supplementary material for: Genome-Wide Scan for Signatures of Human Population Differentiation and Their Relationship with Natural Selection, Functional Pathways and Diseases
Source: PubMed Central journal article supplement (PMC2775949; doi:10.1371/journal.pone.0007927), 2009-11-20
Supplement: pone.0007927.s001.pdf [file pone.0007927.s001.pdf]

# *Genome wide scan for signatures of human population differentiation and their relationship with natural selection, functional pathways and diseases*

*Roberto Amato<sup>1</sup>, Michele Pinelli, Antonella Monticelli, Davide Marino, Gennaro Miele and Sergio Coccozza*

---

## *Supplementary material*

|                                                    |    |
|----------------------------------------------------|----|
| Wright vs. Weir&Cockerham $F_{ST}$ .....           | 2  |
| Per-chromosome statistics of $F_{ST}$ values ..... | 3  |
| Enriched pathways.....                             | 4  |
| Leading edge.....                                  | 11 |
| GAD diseases classification.....                   | 18 |

---

<sup>1</sup> [roamato@na.infn.it](mailto:roamato@na.infn.it)

## Weir&Cockerham vs. Wright $F_{ST}$

---

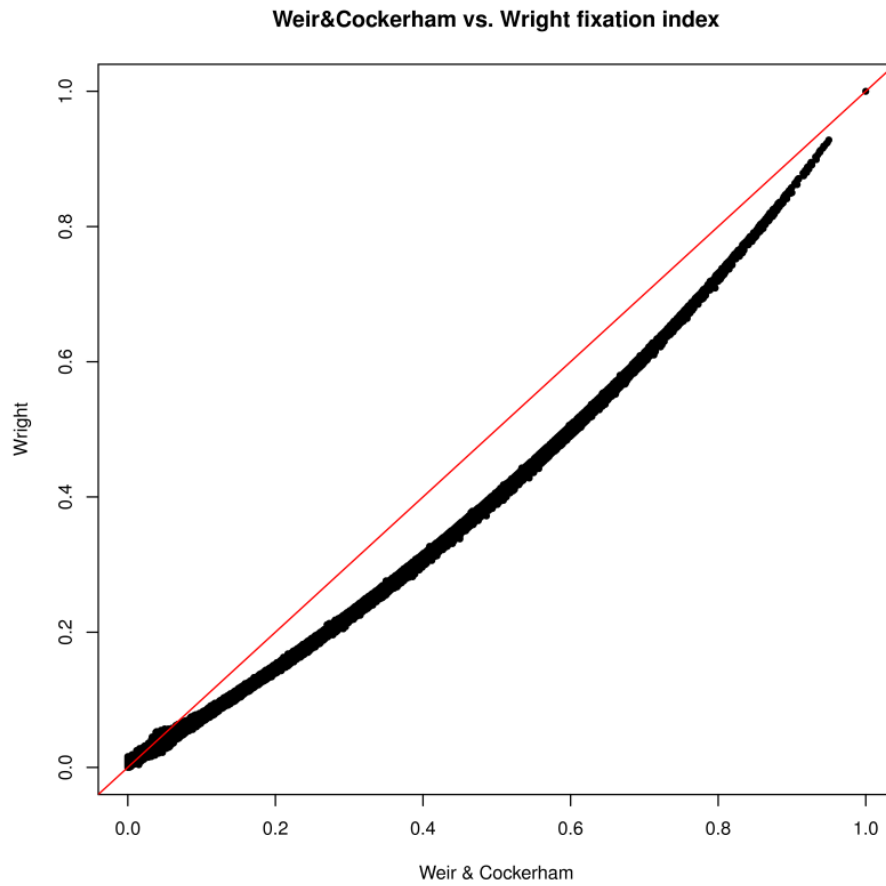

For each SNP, we computed its  $F_{ST}$  value using both the Wright and the Weir&Cockerham estimators. As expected, the two measures are strongly correlated (Spearman's  $\rho=0.97$ ,  $p<10^{-16}$ ).

## Per-chromosome statistics of $F_{ST}$ values

| Chromosome     | Number of SNPs | Mean         | Standard Deviation | Median       | Interquartile range |
|----------------|----------------|--------------|--------------------|--------------|---------------------|
| 1              | 160631         | 0.121        | 0.110              | 0.090        | 0.129               |
| 2              | 182756         | 0.127        | 0.114              | 0.096        | 0.135               |
| 3              | 141273         | 0.123        | 0.111              | 0.092        | 0.134               |
| 4              | 131470         | 0.122        | 0.112              | 0.090        | 0.131               |
| 5              | 138353         | 0.118        | 0.107              | 0.088        | 0.126               |
| 6              | 142779         | 0.114        | 0.104              | 0.084        | 0.123               |
| 7              | 114767         | 0.120        | 0.110              | 0.089        | 0.130               |
| 8              | 119383         | 0.123        | 0.110              | 0.092        | 0.132               |
| 9              | 97952          | 0.120        | 0.108              | 0.089        | 0.128               |
| 10             | 110485         | 0.120        | 0.110              | 0.089        | 0.129               |
| 11             | 106880         | 0.115        | 0.105              | 0.086        | 0.124               |
| 12             | 96493          | 0.119        | 0.108              | 0.089        | 0.126               |
| 13             | 83084          | 0.117        | 0.104              | 0.089        | 0.125               |
| 14             | 67477          | 0.120        | 0.107              | 0.090        | 0.131               |
| 15             | 59040          | 0.130        | 0.116              | 0.098        | 0.138               |
| 16             | 59604          | 0.121        | 0.108              | 0.091        | 0.129               |
| 17             | 50163          | 0.127        | 0.114              | 0.094        | 0.137               |
| 18             | 62453          | 0.116        | 0.103              | 0.089        | 0.123               |
| 19             | 32325          | 0.119        | 0.109              | 0.090        | 0.129               |
| 20             | 51481          | 0.123        | 0.113              | 0.090        | 0.133               |
| 21             | 28532          | 0.120        | 0.110              | 0.089        | 0.128               |
| 22             | 26757          | 0.122        | 0.109              | 0.091        | 0.130               |
| X              | 61204          | 0.174        | 0.153              | 0.129        | 0.189               |
| Y              | 98             | 0.606        | 0.282              | 0.676        | 0.528               |
| <i>Overall</i> | <i>2125440</i> | <i>0.122</i> | <i>0.111</i>       | <i>0.091</i> | <i>0.131</i>        |

## Enriched pathways

KEGG pathways found enriched by using GSEA. Genes are coloured according to their FST value through the “Color objects in KEGG pathways” functionality provided by KEGG ([http://www.genome.jp/kegg/tool/color\\_pathway.html](http://www.genome.jp/kegg/tool/color_pathway.html)).

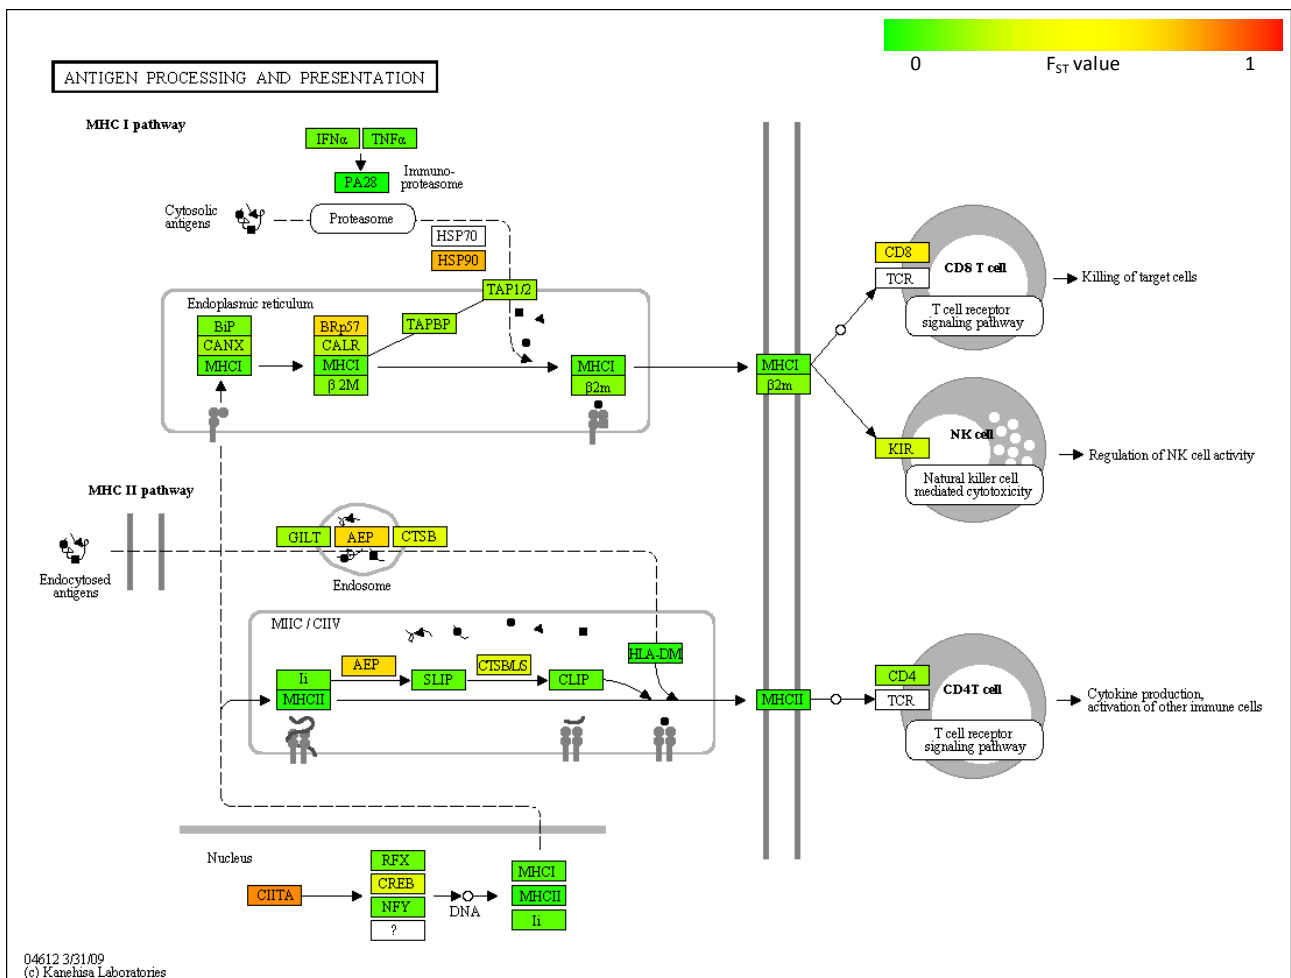





ECM-RECEPTOR INTERACTION

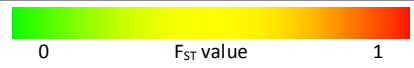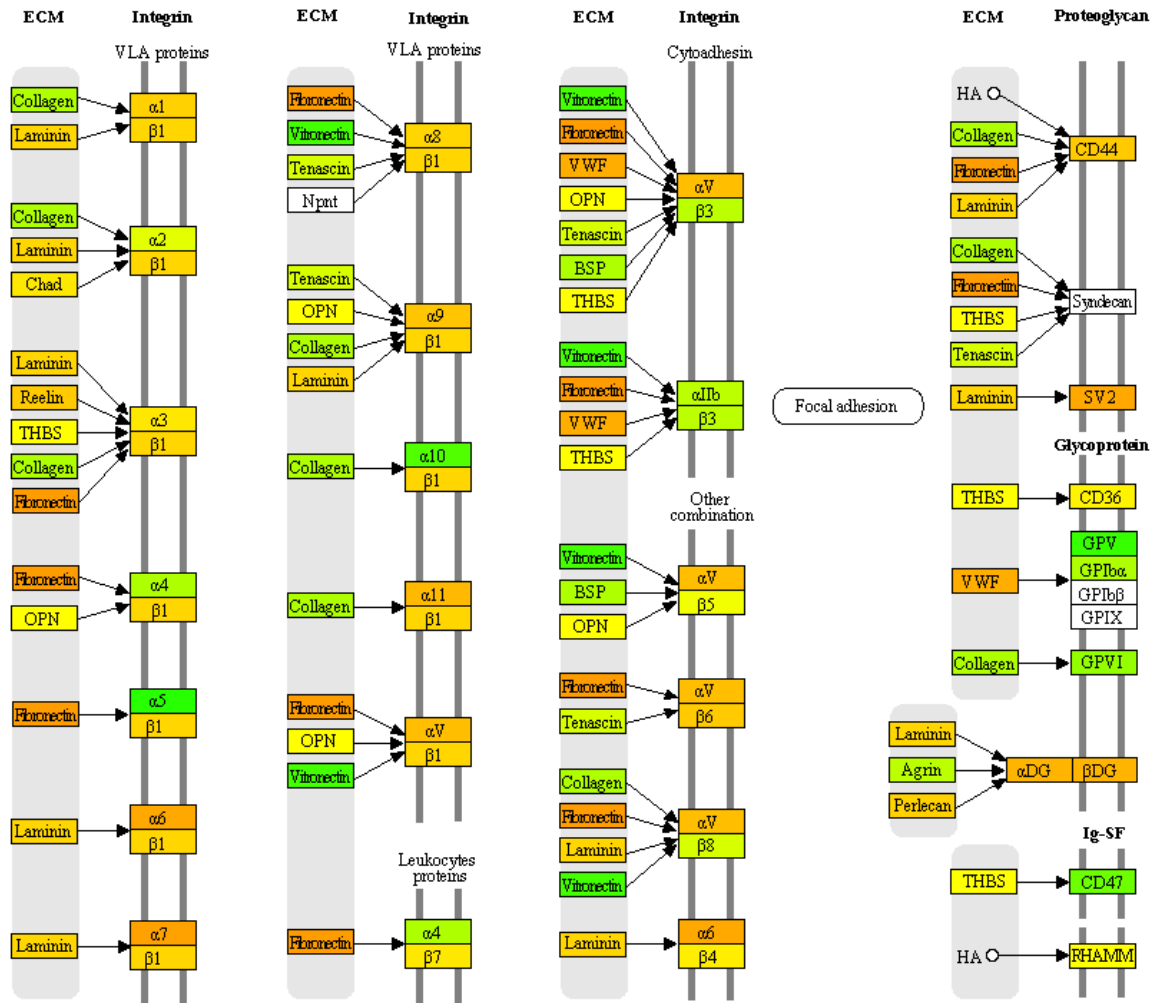

04512 3/31/09  
 (c) Kanehisa Laboratories

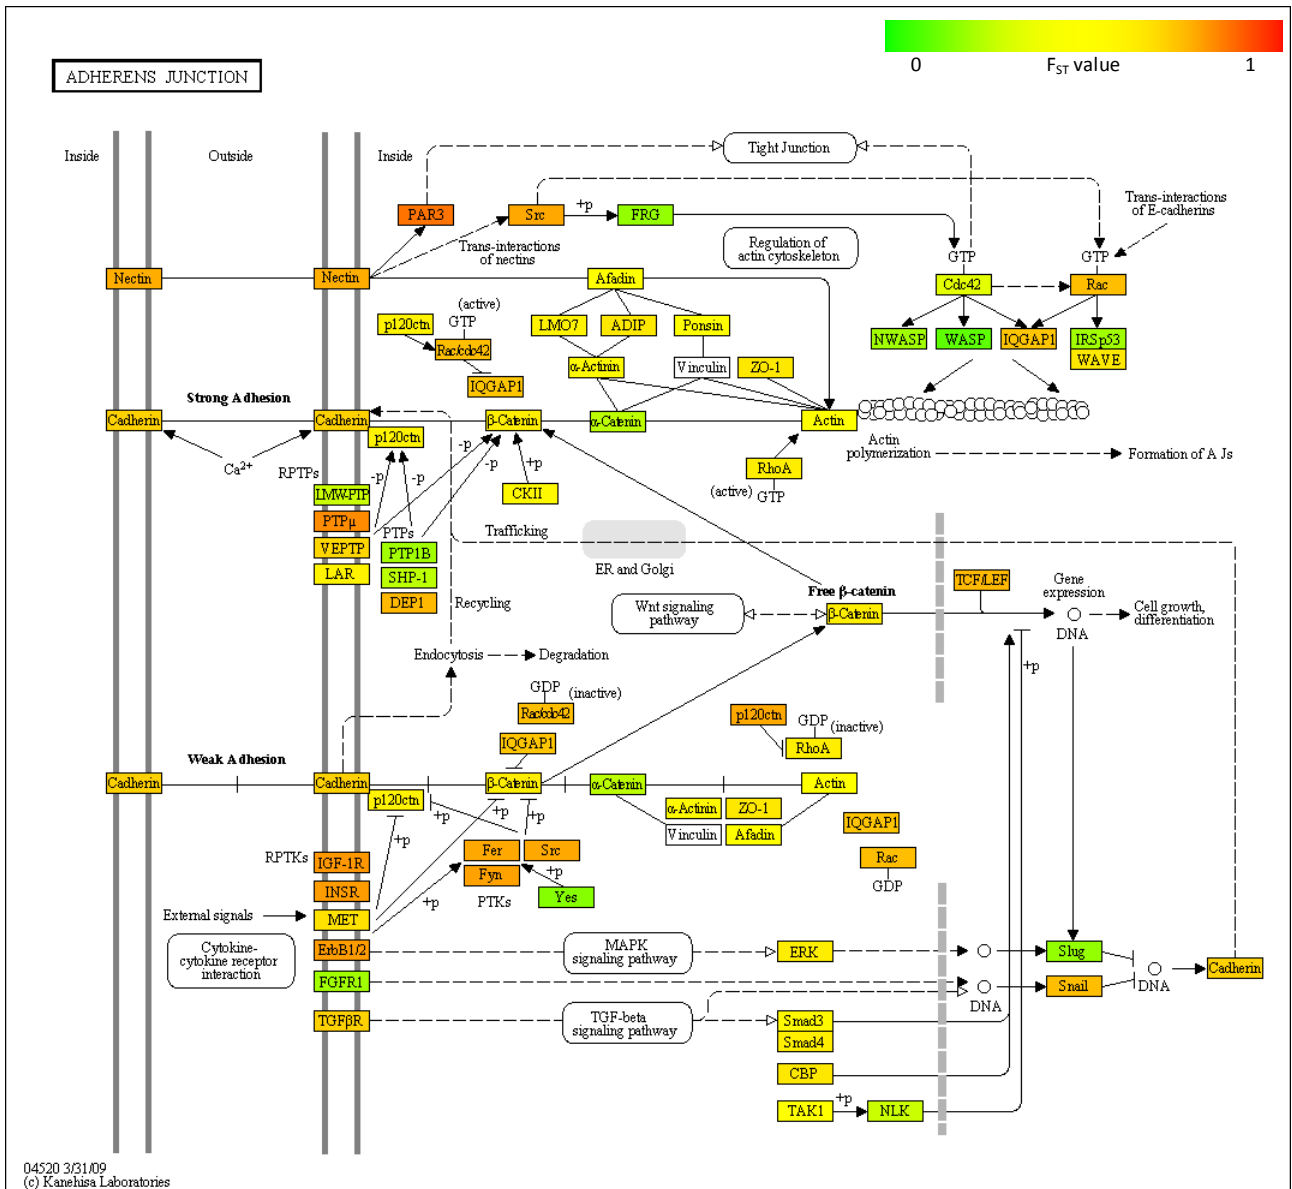

04520 3/31/09  
 (c) Kanehisa Laboratories



REGULATION OF ACTIN CYTOSKELETON

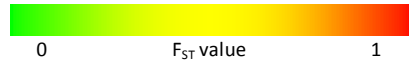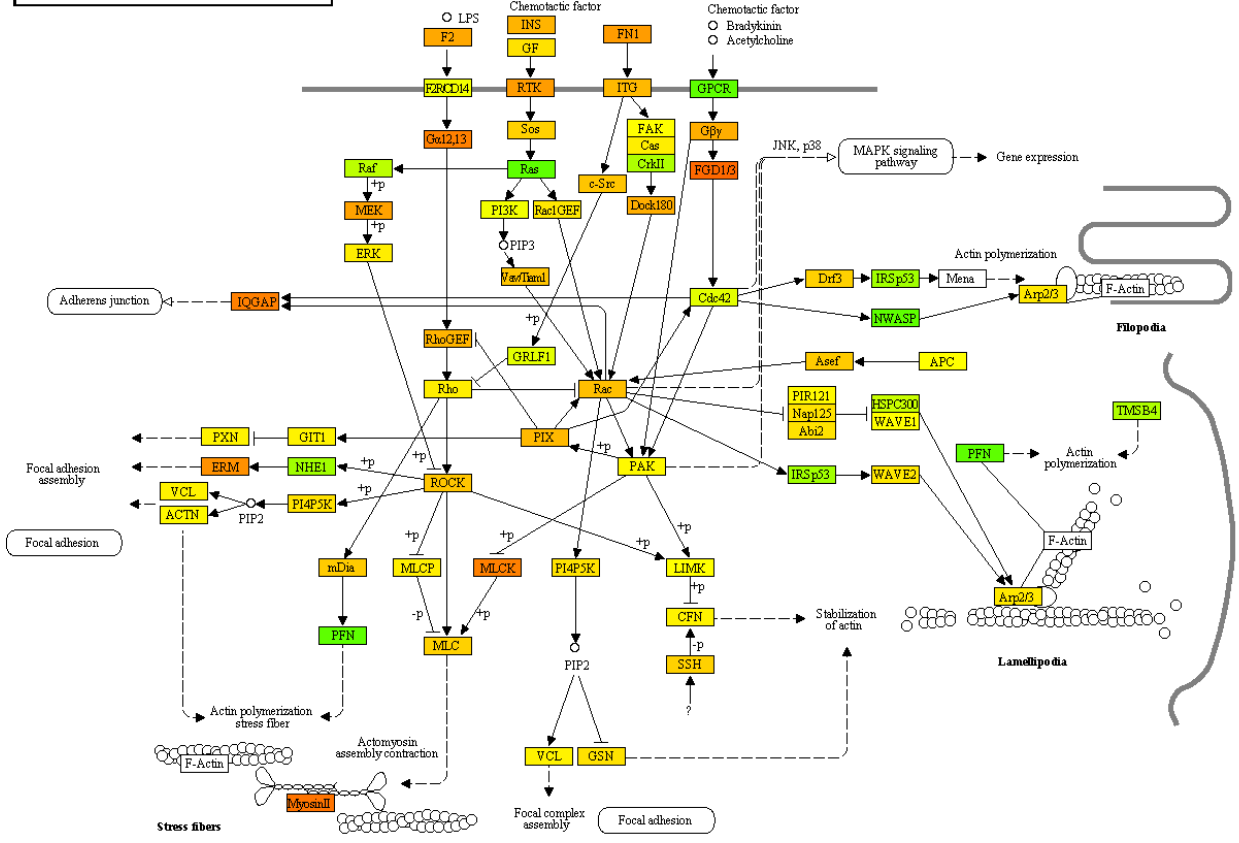

04810 3/21/09  
© Kanehisa Laboratories

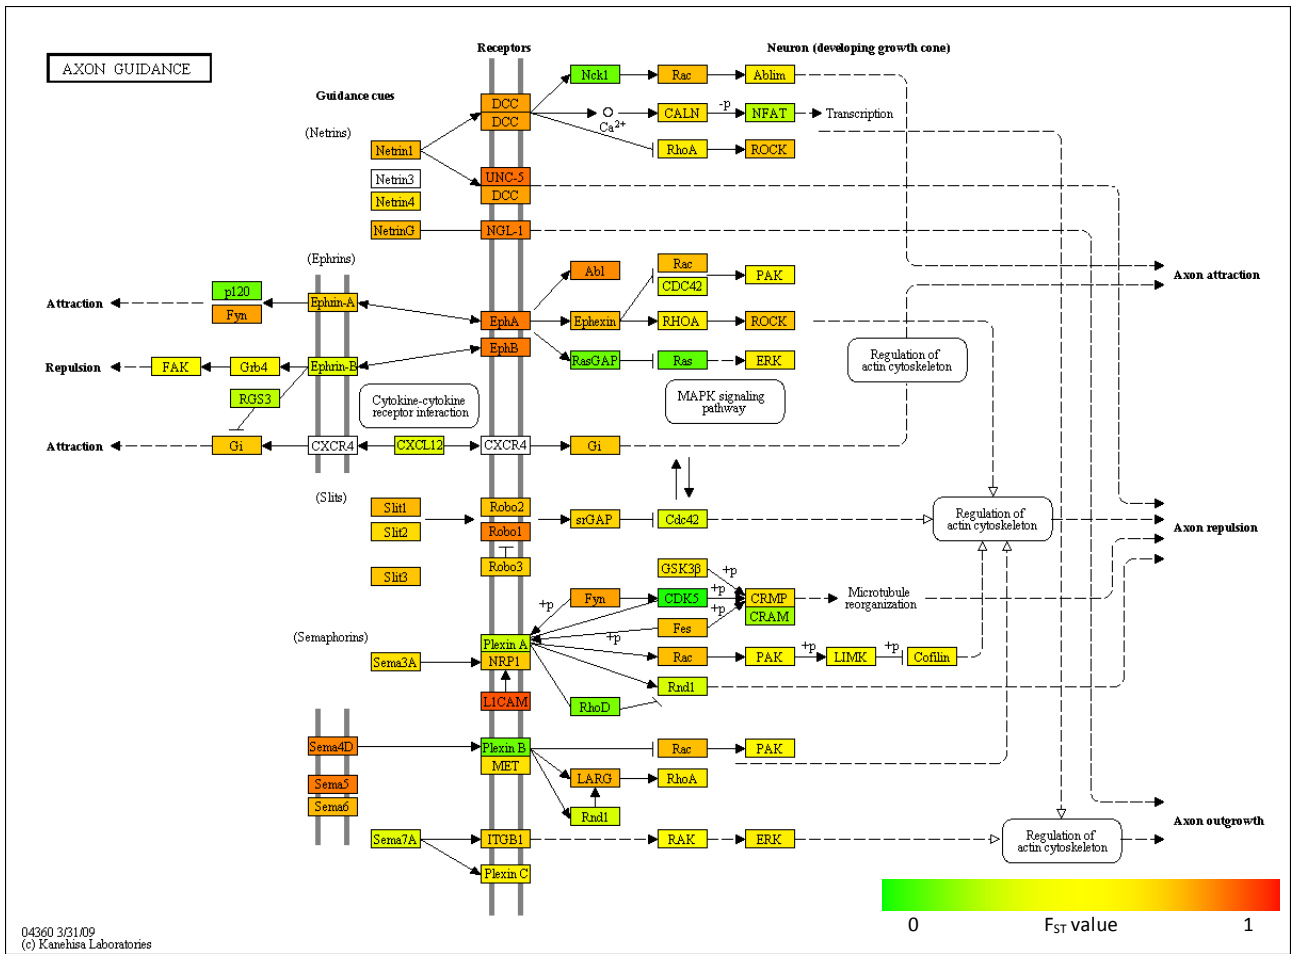

**Antigen processing and presentation pathway**

| Gene     | F <sub>ST</sub> |          |       |         |       |
|----------|-----------------|----------|-------|---------|-------|
| HLA-DRB5 | 0.000           | HLA-C    | 0.100 | KIR2DL4 | 0.151 |
| PSME1    | 0.011           | IFNA13   | 0.102 | B2M     | 0.154 |
| HLA-DRB1 | 0.026           | CD74     | 0.103 | TAP2    | 0.155 |
| KLRC3    | 0.044           | HLA-DQB1 | 0.103 | IFNA16  | 0.170 |
| HLA-DMA  | 0.048           | IFNA8    | 0.109 | CD4     | 0.176 |
| CTSL1    | 0.056           | IFNA10   | 0.113 | IFI30   | 0.182 |
| NFYB     | 0.061           | HLA-F    | 0.114 | KLRC4   | 0.186 |
| HLA-E    | 0.070           | NFYA     | 0.114 | CANX    | 0.193 |
| HLA-B    | 0.082           | IFNA1    | 0.122 | TAPBP   | 0.193 |
| IFNA6    | 0.089           | RFX5     | 0.127 | TAP1    | 0.194 |
| LTA      | 0.092           | HSPA5    | 0.137 | KIR2DS4 | 0.197 |
| HLA-DRA  | 0.093           | IFNA5    | 0.145 | RFXAP   | 0.198 |
| KIR3DL2  | 0.095           | RFXANK   | 0.145 | HLA-DOA | 0.203 |
| IFNA14   | 0.096           | IFNA17   | 0.147 | CTSS    | 0.205 |
| HLA-A    | 0.098           | IFNA4    | 0.147 |         |       |
|          |                 | HLA-DMB  | 0.149 |         |       |

### Calcium signaling pathway

| Gene    | F <sub>ST</sub> |
|---------|-----------------|
| NTSR1   | 0.740           |
| ADCY9   | 0.725           |
| MYLK    | 0.660           |
| ERBB4   | 0.650           |
| CACNA1I | 0.627           |
| ADCY8   | 0.615           |
| EDNRA   | 0.607           |
| CHRM3   | 0.603           |
| ADCY2   | 0.594           |
| PHKA1   | 0.585           |
| CACNA1A | 0.574           |
| EGFR    | 0.572           |
| TRHR    | 0.570           |
| ERBB2   | 0.562           |
| GRM1    | 0.559           |
| PLCD4   | 0.559           |
| RYR3    | 0.556           |
| CAMK2D  | 0.554           |
| PPID    | 0.554           |
| PPP3CA  | 0.553           |
| PLCB1   | 0.545           |
| GNA14   | 0.543           |
| CACNA1G | 0.539           |
| CHRM5   | 0.539           |

|         |       |
|---------|-------|
| PRKCB1  | 0.528 |
| CACNA1D | 0.518 |
| ITPR3   | 0.516 |
| CYSLTR1 | 0.514 |
| AGTR1   | 0.509 |
| SLC8A1  | 0.496 |
| GRM5    | 0.494 |
| ITPR1   | 0.493 |
| PHKA2   | 0.491 |
| ATP2B4  | 0.482 |
| GNAS    | 0.482 |
| SLC8A2  | 0.479 |
| ATP2B3  | 0.476 |
| CACNA1C | 0.474 |
| PLCZ1   | 0.472 |
| CACNA1F | 0.469 |
| OXTR    | 0.468 |
| GRIN2A  | 0.467 |
| PLCB4   | 0.465 |
| CHRM2   | 0.462 |
| HTR5A   | 0.462 |
| ADORA2B | 0.459 |
| PLCG2   | 0.457 |
| ITPR2   | 0.455 |
| RYR2    | 0.451 |

|         |       |
|---------|-------|
| ATP2A2  | 0.450 |
| LHCGR   | 0.447 |
| PRKX    | 0.446 |
| CACNA1B | 0.445 |
| CCKBR   | 0.445 |
| MYLK2   | 0.444 |
| CHRNA7  | 0.443 |
| CALM2   | 0.442 |
| PPP3CB  | 0.440 |
| TACR3   | 0.440 |
| CACNA1S | 0.439 |
| GNAL    | 0.436 |
| TRPC1   | 0.434 |
| CALM1   | 0.431 |
| GNAQ    | 0.423 |
| ADRA1A  | 0.422 |
| ADCY7   | 0.421 |
| CACNA1E | 0.421 |
| NOS1    | 0.421 |
| SLC8A3  | 0.421 |
| ATP2B2  | 0.420 |
| CD38    | 0.418 |
| HTR2C   | 0.418 |

### Focal adhesion pathway

| Gene    | F <sub>ST</sub> |
|---------|-----------------|
| VAV2    | 0.935           |
| GRB2    | 0.752           |
| VEGFC   | 0.732           |
| PARVA   | 0.718           |
| TNXB    | 0.715           |
| COL11A1 | 0.694           |
| LAMA5   | 0.670           |
| VAV1    | 0.667           |
| MYLK    | 0.660           |
| ACTN1   | 0.653           |
| PPP1CA  | 0.629           |
| LAMB4   | 0.620           |
| TNN     | 0.589           |
| COL5A1  | 0.588           |
| IGF1R   | 0.584           |
| LAMA1   | 0.584           |
| FLNB    | 0.574           |
| EGFR    | 0.572           |
| LAMA2   | 0.571           |
| RAF1    | 0.571           |
| FN1     | 0.569           |
| FLNA    | 0.567           |
| SHC3    | 0.565           |
| ERBB2   | 0.562           |
| ITGA7   | 0.559           |

|        |       |
|--------|-------|
| FYN    | 0.556 |
| MAP2K1 | 0.554 |
| SRC    | 0.550 |
| ITGA6  | 0.542 |
| VWF    | 0.534 |
| PRKCB1 | 0.528 |
| DOCK1  | 0.527 |
| ACTN2  | 0.504 |
| ITGA11 | 0.502 |
| LAMA3  | 0.501 |
| TLN2   | 0.496 |
| PDGFD  | 0.492 |
| PAK7   | 0.484 |
| PIK3CD | 0.483 |
| FLT1   | 0.482 |
| ITGAV  | 0.481 |
| PAK3   | 0.478 |
| RAC1   | 0.478 |
| CAV1   | 0.473 |
| CCND1  | 0.469 |
| ROCK1  | 0.468 |
| ITGA9  | 0.464 |
| MAPK10 | 0.463 |
| VAV3   | 0.460 |
| COL5A2 | 0.458 |
| COL6A6 | 0.452 |

|        |       |
|--------|-------|
| DIAPH1 | 0.449 |
| PAK2   | 0.449 |
| BRAF   | 0.445 |
| MYLK2  | 0.444 |
| RELN   | 0.443 |
| COL4A2 | 0.442 |
| ITGB6  | 0.440 |
| AKT1   | 0.439 |
| SOS1   | 0.434 |
| COL4A6 | 0.430 |
| ITGA1  | 0.429 |
| PIK3CA | 0.429 |
| MYL9   | 0.427 |
| LAMA4  | 0.424 |
| PDGFC  | 0.423 |
| COL1A2 | 0.422 |
| ITGA8  | 0.422 |
| ITGB1  | 0.421 |
| PARVB  | 0.421 |
| CAPN2  | 0.420 |
| HGF    | 0.419 |
| PPP1CC | 0.418 |
| LAMC3  | 0.417 |

### ECM-receptor interaction pathway

| Gene    | F <sub>ST</sub> |
|---------|-----------------|
| TNXB    | 0.715           |
| COL11A1 | 0.694           |
| SV2B    | 0.692           |
| LAMA5   | 0.670           |
| LAMB4   | 0.620           |
| TNN     | 0.589           |
| COL5A1  | 0.588           |
| LAMA1   | 0.584           |
| SDC2    | 0.576           |
| LAMA2   | 0.571           |
| FN1     | 0.569           |
| ITGA7   | 0.559           |

|        |       |
|--------|-------|
| SV2C   | 0.545 |
| ITGA6  | 0.542 |
| VWF    | 0.534 |
| DAG1   | 0.515 |
| ITGA11 | 0.502 |
| LAMA3  | 0.501 |
| SDC4   | 0.488 |
| ITGAV  | 0.481 |
| SV2A   | 0.475 |
| ITGA9  | 0.464 |
| COL5A2 | 0.458 |
| CD44   | 0.454 |
| COL6A6 | 0.452 |

|        |       |
|--------|-------|
| RELN   | 0.443 |
| COL4A2 | 0.442 |
| ITGB6  | 0.440 |
| HSPG2  | 0.436 |
| COL4A6 | 0.430 |
| ITGA1  | 0.429 |
| LAMA4  | 0.424 |
| COL1A2 | 0.422 |
| ITGA8  | 0.422 |
| ITGB1  | 0.421 |
| LAMC3  | 0.417 |

### Adherens junction pathway

| Gene   | F <sub>ST</sub> |
|--------|-----------------|
| PARD3  | 0.682           |
| CTNNA3 | 0.677           |
| ACTN1  | 0.653           |
| TCF7L2 | 0.647           |
| TCF7L1 | 0.626           |
| PTPRM  | 0.616           |
| IGF1R  | 0.584           |
| INSR   | 0.579           |

|        |       |
|--------|-------|
| EGFR   | 0.572 |
| ERBB2  | 0.562 |
| FYN    | 0.556 |
| SRC    | 0.550 |
| FER    | 0.543 |
| CTNNA2 | 0.538 |
| PVRL3  | 0.527 |
| ACTN2  | 0.504 |
| PTPRJ  | 0.502 |

|        |       |
|--------|-------|
| LEF1   | 0.501 |
| SMAD3  | 0.487 |
| TGFBR1 | 0.480 |
| RAC1   | 0.478 |
| SNAI1  | 0.474 |
| PVRL1  | 0.462 |
| IQGAP1 | 0.460 |

### Regulation of actin cytoskeleton pathway

| Gene    | F <sub>ST</sub> |  |          |       |        |       |
|---------|-----------------|--|----------|-------|--------|-------|
| VAV2    | 0.935           |  | FGFR2    | 0.538 | DIAPH1 | 0.449 |
| MSN     | 0.930           |  | FGF14    | 0.533 | PAK2   | 0.449 |
| FGD1    | 0.711           |  | TIAM1    | 0.532 | BRAF   | 0.445 |
| MYH9    | 0.693           |  | DOCK1    | 0.527 | MYLK2  | 0.444 |
| ITGAE   | 0.692           |  | PIP4K2A  | 0.521 | ITGB6  | 0.440 |
| ARPC1B  | 0.688           |  | DIAPH2   | 0.519 | ITGAX  | 0.439 |
| VAV1    | 0.667           |  | GNG12    | 0.519 | LIMK2  | 0.437 |
| MYLK    | 0.660           |  | ARHGEF12 | 0.518 | SSH1   | 0.436 |
| ACTN1   | 0.653           |  | FGF12    | 0.515 | SOS1   | 0.434 |
| GNA13   | 0.651           |  | INS      | 0.515 | ITGA1  | 0.429 |
| IQGAP2  | 0.651           |  | ITGAM    | 0.515 | PIK3CA | 0.429 |
| ARHGEF1 | 0.641           |  | ACTN2    | 0.504 | MYL9   | 0.427 |
| SSH3    | 0.630           |  | ARHGEF7  | 0.502 | DIAPH3 | 0.425 |
| PPP1CA  | 0.629           |  | ITGA11   | 0.502 | FGF19  | 0.424 |
| EZR     | 0.613           |  | SSH2     | 0.496 | ITGA8  | 0.422 |
| CHRM3   | 0.603           |  | PAK7     | 0.484 | ITGB1  | 0.421 |
| PIP5K3  | 0.581           |  | PIK3CD   | 0.483 | GNA12  | 0.420 |
| EGFR    | 0.572           |  | ITGAV    | 0.481 | ARPC2  | 0.419 |
| FGF2    | 0.571           |  | PAK3     | 0.478 | FGFR3  | 0.419 |
| RAF1    | 0.571           |  | RAC1     | 0.478 | PPP1CC | 0.418 |
| FN1     | 0.569           |  | KRAS     | 0.471 | APC    | 0.416 |
| ITGA7   | 0.559           |  | ROCK1    | 0.468 | ITGB2  | 0.414 |
| MAP2K1  | 0.554           |  | CSK      | 0.464 | CRKL   | 0.413 |
| F2      | 0.546           |  | ITGA9    | 0.464 | PAK6   | 0.411 |
| ITGA6   | 0.542           |  | CHRM2    | 0.462 |        |       |
| CHRM5   | 0.539           |  | IQGAP1   | 0.460 |        |       |
|         |                 |  | VAV3     | 0.460 |        |       |
|         |                 |  | ARHGEF4  | 0.455 |        |       |



### Axon guidance pathway

| Gene   | F <sub>ST</sub> |
|--------|-----------------|
| EPHA6  | 0.817           |
| L1CAM  | 0.788           |
| PLXNA3 | 0.724           |
| UNC5D  | 0.697           |
| SEMA5B | 0.677           |
| EPHB1  | 0.667           |
| EPHA2  | 0.663           |
| LRRC4C | 0.661           |
| ROBO1  | 0.661           |
| UNC5A  | 0.660           |
| SEMA4C | 0.655           |
| SEMA6D | 0.654           |
| SEMA3E | 0.648           |
| SEMA4F | 0.634           |
| ABL1   | 0.619           |
| SEMA3F | 0.618           |
| EPHB6  | 0.597           |
| DCC    | 0.559           |
| GNAI2  | 0.558           |
| FYN    | 0.556           |
| PPP3CA | 0.553           |

|          |       |
|----------|-------|
| EPHB2    | 0.545 |
| SEMA3B   | 0.544 |
| SEMA6A   | 0.531 |
| UNC5C    | 0.529 |
| ARHGEF12 | 0.518 |
| NFATC1   | 0.518 |
| EFNA5    | 0.511 |
| NTNG1    | 0.502 |
| ABLIM2   | 0.501 |
| SLIT1    | 0.498 |
| NTN1     | 0.492 |
| SEMA6C   | 0.489 |
| ABLIM1   | 0.486 |
| PAK7     | 0.484 |
| PAK3     | 0.478 |
| RAC1     | 0.478 |
| SEMA5A   | 0.475 |
| NGEF     | 0.473 |
| KRAS     | 0.471 |
| ROCK1    | 0.468 |
| SLIT3    | 0.468 |
| NFATC3   | 0.467 |
| FES      | 0.465 |

|        |       |
|--------|-------|
| SEMA3D | 0.464 |
| EFNA4  | 0.463 |
| ROBO2  | 0.461 |
| PAK2   | 0.449 |
| GNAI1  | 0.446 |
| NRP1   | 0.443 |
| PPP3CB | 0.440 |
| LIMK2  | 0.437 |
| NFATC2 | 0.437 |
| ROBO3  | 0.437 |
| SEMA4B | 0.436 |
| UNC5B  | 0.436 |
| EFNA1  | 0.430 |
| SEMA3C | 0.428 |
| ITGB1  | 0.421 |
| SRGAP2 | 0.418 |
| EFNB2  | 0.414 |
| EPHA4  | 0.411 |
| PAK6   | 0.411 |
| SRGAP3 | 0.408 |

## ***GAD diseases classification***

Diseases classification as present in the Genetic Association Database (<http://geneticassociationdb.nih.gov/>).

| <b>Class</b> | <b>Disease</b>                                                |
|--------------|---------------------------------------------------------------|
| <b>AGING</b> |                                                               |
|              | age                                                           |
|              | age of menarche                                               |
|              | age-associated memory impairment                              |
|              | ageing                                                        |
|              | aging                                                         |
|              | Alzheimer's Disease and Vascular Dementia                     |
|              | anticholinergic challenge-induced memory impairment           |
|              | bone resorption                                               |
|              | Brain aging                                                   |
|              | cerebral aging                                                |
|              | cerebral amyloid angiopathy                                   |
|              | cholesterol, HDL; blood pressure, arterial; stroke; longevity |
|              | clinical parameters and endocrine status in elderly men       |
|              | cognitive decline                                             |
|              | cognitive function                                            |
|              | cognitive function in older men                               |
|              | cognitive impairment                                          |
|              | cognitive performance                                         |
|              | degeneration of intervertebral discs                          |
|              | disc degeneration, lumbar spine                               |
|              | disc disease, intervertebral                                  |
|              | diurnal preference                                            |
|              | Dominant Progressive Deafness                                 |
|              | Early cognitive decline                                       |
|              | exceptional longevity                                         |
|              | Exercise-induced changes in insulin                           |
|              | fat-free mass and sarcopenia                                  |
|              | harm avoidance behaviour in an elderly population.            |
|              | life expectancy                                               |
|              | Longevity                                                     |
|              | lumbar disc disease                                           |
|              | memory decline                                                |
|              | memory disturbance                                            |
|              | memory impairment                                             |
|              | muscle strength                                               |
|              | muscle testing                                                |

## CANCER

|                                                                                              |
|----------------------------------------------------------------------------------------------|
| obesity                                                                                      |
| Osteoarthritis                                                                               |
| osteoporosis                                                                                 |
| physical function                                                                            |
| protein fraction levels                                                                      |
| 5' CpG island hypermethylation                                                               |
| acute leukemia                                                                               |
| acute myeloid leukemia                                                                       |
| adenocarcinoma of the lung                                                                   |
| adenocarcinoma of the upper gastrointestinal tract.                                          |
| adenocarcinomas of the parotid gland                                                         |
| adenomatous polyposis                                                                        |
| adenomatous polyposis coli                                                                   |
| adult brain tumors                                                                           |
| adult T-cell leukemia                                                                        |
| advanced colorectal cancer                                                                   |
| advanced prostate cancer                                                                     |
| aerodigestive tract cancers                                                                  |
| aflatoxin-related hepatocarcinogenesis                                                       |
| alpha-fetoprotein                                                                            |
| alpha-particle carcinogenesis                                                                |
| anaplastic astrocytoma; glioblastoma multiforme                                              |
| angiomyolipomas, renal                                                                       |
| Barrett esophagus esophageal cancer                                                          |
| betel-quid chewing                                                                           |
| bladder cancer                                                                               |
| bladder cancer, urinary                                                                      |
| bladder cancer; prostate cancer                                                              |
| blast crisis of chronic myeloid leukaemia                                                    |
| blastic crisis                                                                               |
| bone cancer; soft tissue sarcoma                                                             |
| brain cancer                                                                                 |
| brain tumor                                                                                  |
| brain tumors                                                                                 |
| breast and lung cancer                                                                       |
| breast cancer                                                                                |
| breast cancer breast cancer, male colorectal cancer ovarian cancer prostate cancer           |
| breast cancer by the age of 50 years                                                         |
| breast cancer cervical cancer colorectal cancer esophageal cancer lung cancer stomach cancer |
| breast cancer colorectal cancer stomach cancer                                               |
| breast cancer development                                                                    |
| breast cancer endometriosis uterine fibroids                                                 |
| breast cancer melanoma                                                                       |
| breast cancer ovarian cancer                                                                 |

|                                                                     |
|---------------------------------------------------------------------|
| breast cancer recurrence                                            |
| breast cancer risk                                                  |
| breast cancer risk and prenatal viability                           |
| breast cancer survival                                              |
| breast cancer, male                                                 |
| breast cancer; colorectal cancer; esophageal cancer; stomach cancer |
| breast cancer; endometrial cancer                                   |
| breast cancer; insulin-like growth factor                           |
| breast cancer; ovarian cancer                                       |
| breast cancer; tamoxifen, prophylactic effect of                    |
| breast carcinoma                                                    |
| cancer                                                              |
| cancer lung cancer                                                  |
| Cancer progression and tumor cell motility                          |
| cancer susceptibility                                               |
| cancer tissues                                                      |
| cancer.                                                             |
| cancer; lung cancer                                                 |
| cardia cancer stomach cancer                                        |
| Cell Cancer                                                         |
| cervical cancer                                                     |
| cervical cancer endometrial cancer ovarian cancer                   |
| cervical cancer ovarian cancer                                      |
| chemotherapy-induced leukemia                                       |
| childhood brain tumor                                               |
| Childhood Leukemia                                                  |
| cholangiocarcinoma                                                  |
| cholangiocarcinoma homocysteine                                     |
| chronic atrophic gastritis and gastric carcinoma                    |
| cirrhosis, alcoholic; liver cancer                                  |
| clinicopathological characteristics of hepatocellular carcinoma     |
| clonal evolution of chronic myeloid leukemia                        |
| clonal homozygosity of rectal cell carcinoma                        |
| colon adenomas/carcinomas                                           |
| colon cancer                                                        |
| colon polyps                                                        |
| colorectal adenocarcinomas                                          |
| colorectal adenomas                                                 |
| colorectal cancer                                                   |
| colorectal cancer hyperplastic polyposis                            |
| colorectal cancer stomach cancer                                    |
| colorectal cancer, nonpolyposis                                     |
| colorectal cancer.                                                  |
| colorectal cancer; colon polyps                                     |
| colorectal cancer; drug hypersensitivity                            |
| colorectal cancer; endometrial cancer                               |
| colorectal cancers                                                  |

colorectal carcinomas

colorectal neoplasia.

colorectal polyps (adenoma or hyperplastic)

conventional renal cell carcinoma

C-peptide insulin-like growth factor sex hormones

cryptorchidism infertility, male testicular cancer

cutaneous malignant melanoma

cutaneous malignant melanoma.

cutaneous melanoma which is largely independent of skin type and hair color

CYP1A1 genetic polymorphisms

CYP1A1 polymorphisms

decreased lung cancer risk

decreased risk for breast cancer by age 50

developing lung cancer

diet lifestyle and risk of colon cancer

diffuse gastric cancer

diffuse large B-cell lymphoma

early-onset prostate cancer

early-stage breast cancers

endometrial cancer

endometrial cancer risk.

endometrial carcinoma

endometrioid and clear cell ovarian cancer

esophageal cancer

esophageal cancer and gastric cardiac carcinoma

esophageal cancer gastric cardiac adenocarcinoma

esophageal cancer gastric cardiac cancer

esophageal cancer noncardia gastric carcinoma stomach cancer

esophageal cancer stomach cancer

esophageal cancer; cardiac cancer

esophageal cancer; gastric cardia cancer

esophageal cancer; gastric cardiac cancer

esophageal cancer; stomach cancer

esophageal carcinoma

esophageal squamous cell carcinoma

estrogen receptor status

extra-adrenal and/or malignant pheochromocytomas

familial adenomatous polyposis.

familial melanoma

familial or sporadic prostate cancer.

fibromatosis, aggressive

fibrosis, subcutaneous

folate pool

follicular lymphoma

follicular lymphoma to diffuse large-cell lymphoma

gangliogliomas

gastric adenocarcinoma

|                                                                               |
|-------------------------------------------------------------------------------|
| gastric cancer                                                                |
| gastric carcinoma                                                             |
| gastric carcinoma risk                                                        |
| gastric cardia adenocarcinoma                                                 |
| gastritis, chronic atrophic; stomach cancer                                   |
| gastroesophageal cancer                                                       |
| gene polymorphism coding for increased IL-10 production                       |
| genetic polymorphism                                                          |
| germline BRCA1 mutation                                                       |
| glioblastoma multiforme                                                       |
| H. pylori infection stomach cancer                                            |
| H. pylori infection; stomach cancer                                           |
| Haematological Neoplasias                                                     |
| head and neck cancer                                                          |
| head and neck cancer lung cancer                                              |
| head and neck cancer mutagen sensitivity                                      |
| hepatitis B liver cancer                                                      |
| hepatitis B; cirrhosis; liver cancer                                          |
| hepatitis C; liver cancer                                                     |
| hepatocellular carcinoma                                                      |
| hepatocellular carcinomas                                                     |
| hereditary and sporadic prostate cancer risk.                                 |
| hereditary and sporadic prostate cancer susceptibility.                       |
| hereditary non-polyposis colon cancer.                                        |
| HIF-1alpha protein expression                                                 |
| high exposure to aflatoxin B1.                                                |
| high-grade soft tissue sarcoma                                                |
| Hodgkin's disease                                                             |
| Hodgkin's disease leukemia, myeloid multiple myeloma myelodysplastic syndrome |
| H-ras allele loss                                                             |
| human long-term memory                                                        |
| hypopharyngeal cancer laryngeal cancer                                        |
| increased aggressiveness                                                      |
| increased chromosome aberrations and higher lung cancer risk                  |
| increased development of adult T-cell leukemia/lymphoma                       |
| increased incidence of invasive breast cancer                                 |
| increased lung cancer risk                                                    |
| increasing risk and a poor prognosis of renal cell carcinoma                  |
| kidney angiomyolipomas                                                        |
| kidney cancer                                                                 |
| kidney cancer; bladder cancer                                                 |
| laryngeal cancer                                                              |
| laryngeal squamous cell carcinoma                                             |
| leiomyoma                                                                     |
| leukemia                                                                      |
| leukemia, acute lymphoblastic                                                 |

|                                                                                            |
|--------------------------------------------------------------------------------------------|
| leukemia, acute myeloid                                                                    |
| leukemia, chronic lymphocytic                                                              |
| leukemia, chronic myelogenous                                                              |
| leukemia, lymphoid                                                                         |
| leukemia, myeloid                                                                          |
| leukemia/lymphoma, T-Cell                                                                  |
| leukemia; leukemia, myelodysplastic (TRLIMDS)                                              |
| leukemia; Noonan syndrome                                                                  |
| liver cancer                                                                               |
| liver cancer; liver disease                                                                |
| lung adenocarcinoma                                                                        |
| lung cancer                                                                                |
| lung cancer and preneoplastic bronchial lesions                                            |
| lung cancer risk                                                                           |
| lung cancer smoking behavior                                                               |
| lung cancer susceptibility and prognosis                                                   |
| lung cancer, non-small cell                                                                |
| lung cancer; breast cancer                                                                 |
| lung cancer; breast cancer; bladder cancer; cervical cancer                                |
| lung cancer; breast cancer; liver cancer; oral cancer; thyroid cancer; cervical cancer     |
| lung cancer; colorectal cancer; esophageal cancer; head and neck cancer                    |
| lung cancer; esophageal cancer                                                             |
| lung cancer; esophageal cancer; stomach cancer; bladder cancer                             |
| lung cancer; Lambert-Eaton myasthenic syndrome                                             |
| lung carcinoma                                                                             |
| Lung carcinomas                                                                            |
| lung squamous cell carcinoma                                                               |
| lymph node involvement and other histopathological indicators of high metastatic potential |
| lymphocytic leukemia                                                                       |
| lymphoma                                                                                   |
| lymphoma, cutaneous T-cell                                                                 |
| lymphoma, non-Hodgkin                                                                      |
| lymphovascular tumor invasion stomach cancer                                               |
| macroglobulinemia                                                                          |
| male breast cancer                                                                         |
| malignancy                                                                                 |
| malignant melanoma                                                                         |
| mamographic density                                                                        |
| melanoma                                                                                   |
| melanoma skin cancer                                                                       |
| melanoma, cutaneous                                                                        |
| meningioma                                                                                 |
| metastases                                                                                 |
| metastatic breast cancer                                                                   |
| metastatic colorectal cancer                                                               |

|                                                                  |
|------------------------------------------------------------------|
| Metastatic Melanoma                                              |
| metastatic progression and poor survival                         |
| microsatellite instability                                       |
| MPO -463 A allele                                                |
| mucosa-associated lymphoid tissue lymphoma                       |
| multiple endocrine neoplasia                                     |
| multiple endocrine neoplasia type 2A                             |
| Multiple familial trichoepithelioma and familial cylindromatosis |
| multiple myeloma                                                 |
| multiple oesophageal dysplasia                                   |
| myeloblastic leukemias                                           |
| myeloma, multiple                                                |
| nasopharyngeal cancer                                            |
| nasopharyngeal carcinoma                                         |
| neuroblastoma                                                    |
| neurofibromatosis 1                                              |
| Neurofibromatosis type 2                                         |
| neurofibromatosis2                                               |
| nevroid basal cell carcinoma syndrome associated                 |
| noncardia gastric cancer                                         |
| Non-Hodgkin's B cell lymphoma                                    |
| non-Hodgkin's lymphoma                                           |
| non-papillary renal cell carcinomas                              |
| non-small cell lung cancer                                       |
| oesophageal squamous cell carcinoma                              |
| oligodendrogliomas                                               |
| oral cancer                                                      |
| oral cancer oral submucous fibrosis                              |
| oral cancer; oral submucous fibrosis                             |
| oral clefting                                                    |
| oral squamous cell cancer                                        |
| orolaryngeal cancer                                              |
| orolaryngeal carcinoma                                           |
| osteosarcoma                                                     |
| ovarian cancer                                                   |
| ovarian cancer; thyroid cancer; pheochromocytoma                 |
| ovarian carcinoma                                                |
| pancreatic adenocarcinoma                                        |
| pancreatic cancer                                                |
| pancreatic cancer; pancreatitis, chronic                         |
| pancreatic carcinoma                                             |
| pancreatitis; pancreatic cancer                                  |
| paragangliomas                                                   |
| paragangliomas, head and neck                                    |
| paragangliomas, head and neck; pheochromocytomas                 |
| parathyroid cancer                                               |
| peptic ulcer stomach cancer                                      |



|                                                                                         |
|-----------------------------------------------------------------------------------------|
| pheochromocytoma                                                                        |
| pituitary cancer                                                                        |
| predisposition to cancer                                                                |
| prenatal viability                                                                      |
| progression of a prostate carcinoma                                                     |
| prostate cancer                                                                         |
| prostate cancer prostate specific antigen                                               |
| prostate carcinoma                                                                      |
| prostate enlargement                                                                    |
| prostatic hyperplasia                                                                   |
| prostatic hyperplasia; prostate cancer                                                  |
| protein loss                                                                            |
| proximal chromosome 9p to q and distal chromosome 9q                                    |
| PSA mRNA expression                                                                     |
| radiation, ionizing, sensitivity to                                                     |
| radiation-induced damage to normal tissues                                              |
| reduced lung cancer risk and a modulating effect on nucleotide excision repair capacity |
| reduced risk of lung cancer                                                             |
| renal cancer                                                                            |
| renal cell carcinoma                                                                    |
| retinoblastoma                                                                          |
| rhabdoid tumors                                                                         |
| schistosomiasis                                                                         |
| sensitivity to TZT-1027                                                                 |
| skin cancer, nonmelanoma                                                                |
| skin cancer, non-melanoma                                                               |
| skin cancer; squamous cell carcinoma; carcinoma, basal cell                             |
| skin carcinomas                                                                         |
| smoking                                                                                 |
| soft tissue sarcoma                                                                     |
| squamous cell carcinoma                                                                 |
| squamous cell carcinoma of the head and neck                                            |
| stomach cancer                                                                          |
| stomach cancer vascular endothelial growth factor levels                                |
| stomach cancer; gastric ulcer; gastritis; duodenal ulcer                                |
| stomach cancer; gastritis                                                               |
| stomach cancer; ovarian cancer                                                          |
| stomach cancer; stomach atrophy                                                         |
| testicular cancer                                                                       |
| thyroid cancer                                                                          |
| thyroid cancer; Hirschsprung's disease                                                  |
| thyroid cancer; thyroid carcinoma, sporadic medullary                                   |
| thyroid carcinoma                                                                       |
| transcriptional inactivation of the FHIT gene                                           |
| transitional cell carcinoma of the bladder.                                             |
| tuberculosis; esophageal cancer                                                         |

## CARDIOVASCULAR

|                                                                            |
|----------------------------------------------------------------------------|
| tumor progression                                                          |
| tumor progression of BCR/ABL negative chronic myeloproliferative disorders |
| tumor proliferation and other prognostic indicators                        |
| tumour grade                                                               |
| tumour kinetics and chromosomal instability                                |
| tumour progression                                                         |
| upper aerodigestive tract cancer                                           |
| urinary bladder cancer                                                     |
| urothelial cancer                                                          |
| uterine endometrial carcinoma                                              |
| von Hippel-Lindau syndrome (VHL).                                          |
| von Hippel-Lindau tumour                                                   |
| von Hippel-Lindau type 2A                                                  |
| vulvar cancer                                                              |
| vulvar carcinogenesis                                                      |
| Wilm's tumor                                                               |
| wilms' tumor and congenital male genitourinary malformation                |
| Wilms tumors                                                               |
|                                                                            |
| Abdominal adiposity and Hypertension                                       |
| abdominal aortic aneurysm                                                  |
| abdominal aortic aneurysm homocysteine hypertension                        |
| acute coronary syndrome                                                    |
| acute coronary syndrome diabetes, type 2 hypertension                      |
| acute myocardial infarction                                                |
| age at first coronary bypass operation                                     |
| aging                                                                      |
| amyloid cardiomyopathy                                                     |
| aneurysm, abdominal aortic                                                 |
| aneurysm, intracranial                                                     |
| aneurysmal subarachnoid hemorrhage                                         |
| angina                                                                     |
| angina, unstable                                                           |
| angina, vasospastic                                                        |
| angina, vasospastic atherosclerosis, coronary                              |
| angioedema                                                                 |
| angiotensin-converting enzyme genotype                                     |
| aortic dissection                                                          |
| aortic dissection atherosclerosis, coronary stroke                         |
| aortic stenosis                                                            |
| aortic stiffness and disease severity                                      |
| aortoarteritis                                                             |
| arrhythmia, cardiac                                                        |
| arterial disease                                                           |
| arterial stiffness                                                         |
| arterial wall changes                                                      |

|                                                                                                                 |
|-----------------------------------------------------------------------------------------------------------------|
| arterial wall thickness                                                                                         |
| arteriovenous dysplasias brain hemorrhage                                                                       |
| arteriovenous fistulas                                                                                          |
| atherosclerosis                                                                                                 |
| atherosclerosis diabetes, type 2 inflammation zinc                                                              |
| atherosclerosis, carotid                                                                                        |
| atherosclerosis, carotid coronary artery calcium, intimal medial thickness                                      |
| atherosclerosis, carotid intima media thickness                                                                 |
| atherosclerosis, carotid kidney failure, chronic                                                                |
| atherosclerosis, carotid myocardial infarct                                                                     |
| atherosclerosis, coronary                                                                                       |
| atherosclerosis, coronary body mass cholesterol, HDL cholesterol, LDL cholesterol, VLDL                         |
| atherosclerosis, coronary carotid artery damage                                                                 |
| atherosclerosis, coronary cholesterol                                                                           |
| atherosclerosis, coronary cholesterol, HDL                                                                      |
| atherosclerosis, coronary cholesterol, HDL triglycerides                                                        |
| atherosclerosis, coronary C-reactive protein myocardial infarct                                                 |
| atherosclerosis, coronary endothelial function hypercholesterolemia lipids                                      |
| atherosclerosis, coronary lipids lipoprotein                                                                    |
| atherosclerosis, coronary lipoprotein                                                                           |
| atherosclerosis, coronary lipoprotein triglycerides                                                             |
| atherosclerosis, coronary myocardial infarct                                                                    |
| atherosclerosis, coronary unstable coronary syndrome                                                            |
| atherosclerosis, coronary; acute coronary syndrome                                                              |
| atherosclerosis, coronary; diabetes, type 1; nephropathy in other diseases                                      |
| atherosclerosis, coronary; diabetes, type 2                                                                     |
| atherosclerosis, coronary; diabetes, type 2; C-reactive protein                                                 |
| atherosclerosis, coronary; diabetes, type 2; lipoprotein                                                        |
| atherosclerosis, coronary; hematology indices                                                                   |
| atherosclerosis, coronary; homocysteine                                                                         |
| atherosclerosis, coronary; hypertension                                                                         |
| atherosclerosis, coronary; lipid metabolism disorders                                                           |
| atherosclerosis, coronary; lipids; longevity; apoB levels                                                       |
| atherosclerosis, coronary; lipoprotein                                                                          |
| atherosclerosis, coronary; lipoprotein; lipids                                                                  |
| atherosclerosis, coronary; metabolic syndrome                                                                   |
| atherosclerosis, coronary; metabolism disorders                                                                 |
| atherosclerosis, coronary; myocardial dysfunction, non-ischaemic                                                |
| atherosclerosis, diabetic                                                                                       |
| atherosclerosis, generalized                                                                                    |
| atherosclerosis, generalized body fat                                                                           |
| atherosclerosis, generalized cardiovascular disease cerebrovascular disease myocardial infarct stroke, ischemic |
| atherosclerosis, generalized cholesterol, HDL triglycerides                                                     |
| atherosclerosis, generalized C-reactive protein                                                                 |
| atherosclerosis, generalized myocardial infarct                                                                 |

|                                                                                                               |
|---------------------------------------------------------------------------------------------------------------|
| atherosclerosis, generalized; vascular disease                                                                |
| atherosclerosis; angina                                                                                       |
| atherosclerosis; coronary vascular endothelial dysfunction                                                    |
| Atherothrombosis                                                                                              |
| atherothrombotic disease                                                                                      |
| atrial fibrillation                                                                                           |
| bilateral iliac vein thrombosis                                                                               |
| blood flow                                                                                                    |
| blood pressure                                                                                                |
| blood pressure phenotypes.                                                                                    |
| blood pressure, arterial                                                                                      |
| blood pressure, arterial body mass cholesterol, HDL metabolic syndrome                                        |
| blood pressure, arterial body mass glucose insulin lipids                                                     |
| blood pressure, arterial body mass glucose tolerance lipids                                                   |
| blood pressure, arterial body mass kidney disease metabolic syndrome myocardial infarct obesity triglycerides |
| blood pressure, arterial cholesterol                                                                          |
| blood pressure, arterial cholesterol insulin resistance metabolic syndrome                                    |
| blood pressure, arterial diabetes, type 2 glucose insulin                                                     |
| blood pressure, arterial diabetes, type 2 insulin                                                             |
| blood pressure, arterial electrolyte levels                                                                   |
| blood pressure, arterial hypertension                                                                         |
| blood pressure, arterial hypertriglyceridemia                                                                 |
| blood pressure, arterial intima-media thickness                                                               |
| blood pressure, arterial kidney function                                                                      |
| blood pressure, arterial obesity                                                                              |
| blood pressure, arterial urinary sodium                                                                       |
| blood pressure, arterial; arterial wall changes                                                               |
| blood pressure, arterial; atherosclerosis                                                                     |
| blood pressure, arterial; carotid atherosclerosis                                                             |
| blood pressure, arterial; cystic fibrosis                                                                     |
| blood pressure, arterial; renin activity; aldosterone                                                         |
| blood pressure; hyperlipidemia, familial combined                                                             |
| body mass                                                                                                     |
| body mass cardiovascular risk factors lipoprotein                                                             |
| body mass coronary artery bypass graft                                                                        |
| body mass; left ventricular function; blood pressure; left ventricular structure                              |
| brain aneurysm                                                                                                |
| brain function                                                                                                |
| brain hemorrhage                                                                                              |
| brain hemorrhage cerebral infarct, atherothrombotic stroke, lacunar                                           |
| brain hemorrhage; stroke, ischemic                                                                            |
| brain hemorrhage; stroke; stroke, lacunar                                                                     |
| brain infarction                                                                                              |
| Brugada syndrome                                                                                              |
| Budd-Chiari syndrome hematology indices polycythemia vera                                                     |
| Budd-Chiari syndrome liver transplant portal vein thrombosis                                                  |

|                                                                                                                                       |
|---------------------------------------------------------------------------------------------------------------------------------------|
| calcific aortic valve stenosis                                                                                                        |
| calcium cardiac death heart disease, ischemic myocardial infarct phosphate                                                            |
| cardiac and cutaneous amyloidosis                                                                                                     |
| cardiac arrhythmias and sudden death                                                                                                  |
| cardiac conduction disturbances and degenerative changes                                                                              |
| cardiac death                                                                                                                         |
| cardiac death cardiovascular disease oxidative stress                                                                                 |
| cardiac death myocardial infarct                                                                                                      |
| cardiac death QT interval                                                                                                             |
| cardiac death; cardiac morbidity                                                                                                      |
| cardiac function                                                                                                                      |
| cardiac growth                                                                                                                        |
| cardiac repolarization                                                                                                                |
| cardiac sarcoidosis                                                                                                                   |
| cardiomyopathy                                                                                                                        |
| cardiomyopathy hypertension left ventricular hypertrophy                                                                              |
| cardiomyopathy, idiopathic dilated                                                                                                    |
| cardiomyopathy, nonfamilial hypertrophic                                                                                              |
| cardiomyopathy; heart failure                                                                                                         |
| cardiomyopathy; MELAS syndrome                                                                                                        |
| cardiopulmonary disease                                                                                                               |
| cardiorespiratory fitness cholesterol, HDL                                                                                            |
| cardiotoxicity, anthracycline-induced                                                                                                 |
| cardiovascular                                                                                                                        |
| cardiovascular abnormalities                                                                                                          |
| cardiovascular complications diabetes, type 2 hypertension obesity polycystic ovarian syndrome                                        |
| cardiovascular death                                                                                                                  |
| cardiovascular disease                                                                                                                |
| cardiovascular disease cholesterol cholesterol, HDL cholesterol, VLDL hyperlipidemia intima-media thickness lipoprotein triglycerides |
| cardiovascular disease cholesterol, LDL diabetes, type 2 triglycerides                                                                |
| cardiovascular disease; bilirubin                                                                                                     |
| cardiovascular disease; carotid artery damage                                                                                         |
| cardiovascular disease; cerebrovascular disease                                                                                       |
| cardiovascular disease; diabetes, type 1; proteinuria                                                                                 |
| cardiovascular disease; kidney failure, chronic                                                                                       |
| cardiovascular disease; stroke; stroke, ischemic                                                                                      |
| cardiovascular events in non-smokers                                                                                                  |
| cardiovascular mortality                                                                                                              |
| cardiovascular response to metoprolol                                                                                                 |
| cardiovascular risk                                                                                                                   |
| cardiovascular risk factors                                                                                                           |
| carotid and femoral artery stiffness                                                                                                  |
| carotid arterial wall thickness                                                                                                       |
| carotid artery atherosclerosis                                                                                                        |
| carotid artery damage                                                                                                                 |

|                                                                                                       |
|-------------------------------------------------------------------------------------------------------|
| carotid artery distensibility                                                                         |
| carotid artery intima-media thickness                                                                 |
| carotid artery stenosis                                                                               |
| carotid atherosclerosis                                                                               |
| carotid intimal-medial thickening                                                                     |
| carotid intima-media thickness                                                                        |
| carotid wall thickening                                                                               |
| cerebral amyloid angiopathy                                                                           |
| cerebral amyloid angiopathy-related hemorrhage.                                                       |
| cerebral arteriopathy                                                                                 |
| cerebral atherosclerosis                                                                              |
| cerebral circulation                                                                                  |
| Cerebral Circulation in Smokers                                                                       |
| cerebral hemorrhage                                                                                   |
| cerebral infarct                                                                                      |
| cerebral infarct, atherosclerotic cholesterol, HDL intima media thickness triglycerides               |
| cerebral infarct, atherothrombotic                                                                    |
| cerebral infarct; stroke, lacunar                                                                     |
| cerebral infarction                                                                                   |
| cerebral ischemia                                                                                     |
| cerebral venous thrombosis                                                                            |
| cerebrovascular disease                                                                               |
| cerebrovascular disease, ischemic                                                                     |
| cerebrovascular disease, ischemic; fibrinogen                                                         |
| cervical artery dissection, spontaneous                                                               |
| cholesterol cholesterol, HDL cholesterol, LDL fatty acid glucose insulin lipoprotein triacylglycerols |
| cholesterol cholesterol, HDL cholesterol, LDL lipoprotein triglycerides                               |
| cholesterol lipoprotein retinyl palmitate triglycerides                                               |
| cholesterol triglycerides                                                                             |
| cholesterol, HDL                                                                                      |
| cholesterol, HDL triglycerides                                                                        |
| cholesterol, HDL; triglycerides; coronary artery disease; cerebral infarction                         |
| Cigarette Smoking. Coronary Artery Disease. and Diabetes                                              |
| congenital cardiac malformations                                                                      |
| congestive heart failure                                                                              |
| coronary artery calcification                                                                         |
| coronary artery calcium                                                                               |
| coronary artery disease                                                                               |
| coronary artery disease and myocardial infarction                                                     |
| coronary artery disease, occlusive                                                                    |
| coronary artery disease; aortic stiffness                                                             |
| coronary artery disease; coronary atherosclerosis                                                     |
| coronary artery disease; P-selectin                                                                   |
| coronary artery disease; stroke                                                                       |
| coronary artery disease; sudden cardiac death                                                         |

|                                                                                      |
|--------------------------------------------------------------------------------------|
| coronary artery ectasia                                                              |
| coronary artery luminal dimensions                                                   |
| coronary artery plaque calcification                                                 |
| coronary artery spasm                                                                |
| coronary artery stenosis                                                             |
| coronary artery vasoconstriction.                                                    |
| coronary atherosclerosis                                                             |
| coronary atherosclerosis.                                                            |
| coronary atherosclerotic heart disease in Chinese                                    |
| coronary calcification                                                               |
| coronary endothelial vasodilator function                                            |
| coronary events                                                                      |
| Coronary Heart Disease                                                               |
| coronary heart disease among Japanese.                                               |
| coronary heart disease and serum very low density lipopro                            |
| coronary heart disease in non-insulin-dependent diabetic                             |
| coronary heart disease in younger individuals.                                       |
| coronary heart disease, transplant associated                                        |
| coronary heart disease.                                                              |
| coronary heart disease; hypertension; myocardial infarction                          |
| coronary heart disease; myocardial infarction                                        |
| coronary heart disease; myocardial infarction; stroke; cerebrovascular disease       |
| coronary in-stent restenosis.                                                        |
| coronary spasm.                                                                      |
| coronary spastic angina.                                                             |
| coronary vasculopathy                                                                |
| coronary vasomotor function                                                          |
| CP infection.                                                                        |
| C-reactive protein                                                                   |
| C-reactive protein myocardial infarct                                                |
| decreased blood pressure and plasma triglycerides                                    |
| deep venous thrombosis                                                               |
| dementia                                                                             |
| development of coronary artery lesions                                               |
| diabetes, type 2 dyslipidemia heart disease, ischemic                                |
| diabetes, type 2 hypertension lipoprotein                                            |
| diabetes, type 2; hypertension                                                       |
| diabetes, type 2; hypertension; atherosclerosis; cerebrovascular disease; dyslipemia |
| diastolic blood pressure                                                             |
| dilated cardiomyopathy                                                               |
| early onset ischemic heart disease.                                                  |
| early-onset aggressive diffuse amyloidosis                                           |
| EKG, abnormal                                                                        |
| emphysema                                                                            |
| endothelial dysfunction hypertension                                                 |
| endothelial dysfunction in normal humans.                                            |

|                                                                    |
|--------------------------------------------------------------------|
| endothelial function                                               |
| endothelial function von Willebrand factor                         |
| endothelium-dependent arterial dilation                            |
| epinephrine lung function norepinephrine                           |
| Essential Hypertension                                             |
| expired myocardial infarction                                      |
| familial combined hyperlipidemia                                   |
| familial hypertension of early onset.                              |
| familial hypertrophic cardiomyopathy.                              |
| familial premature myocardial infarction.                          |
| ferritin                                                           |
| fetal loss, late                                                   |
| fibrinogen myocardial infarct                                      |
| flow-mediated dilatation of the brachial artery                    |
| gastric cancer                                                     |
| giant cell arteritis                                               |
| giant cell arteritis.                                              |
| giant cell arteritis; polymyalgia rheumatica                       |
| grade II hypertension                                              |
| heart anomalies, congenital                                        |
| heart disease risk factors hypertension leptin obesity             |
| heart disease, ischemic                                            |
| heart disease, ischemic stroke, ischemic                           |
| heart disease, ischemic; atherosclerosis, coronary; hyperlipidemia |
| heart disease, ischemic; cerebrovascular disease, ischemic         |
| heart disease, ischemic; insulin                                   |
| heart disease, ischemic; peripheral vascular disease               |
| heart failure                                                      |
| heart period signal                                                |
| heart rate                                                         |
| heart rate variability                                             |
| heart rate, resting                                                |
| heart rate; arrhythmia, cardiac                                    |
| heart rate; risperidone metabolism                                 |
| heart transplant                                                   |
| heart transplant complications                                     |
| Heart-Hand Syndrome, Holt-Oram Syndrome                            |
| hemorrhage, intracerebral                                          |
| hemorrhagic and ischemic stroke                                    |
| high coronary heart disease risk particularly affects ser          |
| high density lipoprotein cholesterol level                         |
| hypercholesterolemia coronary artery disease                       |
| hypercholesterolemia peripheral vascular disease                   |
| hyperhomocysteinemia and cardiovascular disease                    |
| hypertension                                                       |
| hypertension and left ventricular mass                             |
| hypertension and obesity                                           |



|                                                                       |
|-----------------------------------------------------------------------|
| hypertension NADPH oxidase activity                                   |
| hypertension vascular aging                                           |
| hypertension, cirrhotic portal                                        |
| hypertension, pregnancy induced                                       |
| hypertension, pregnancy induced preeclampsia                          |
| hypertension, pulmonary arterial                                      |
| hypertension, response to exercise                                    |
| hypertension; autonomic nervous system dysfunction                    |
| hypertension; blood pressure                                          |
| hypertension; blood pressure, arterial                                |
| hypertension; cardiovascular disease                                  |
| hypertension; cerebral infarction                                     |
| hypertension; cirrhosis                                               |
| hypertension; exercise                                                |
| hypertension; glucose                                                 |
| hypertension; insulin; metabolic syndrome; hypertriglyceridemia       |
| hypertension; insulin; obesity                                        |
| hypertension; left ventricular hypertrophy                            |
| hypertension; left ventricular structure                              |
| hypertension; myocardial infarction                                   |
| hypertension; preeclampsia                                            |
| hypertension; renal disease, end stage                                |
| hypertension; renal sodium handling                                   |
| hypertension; stroke                                                  |
| hypertension; stroke, ischemic                                        |
| hypertension; stroke, lacunar; atherothrombotic brain infarction      |
| hypertrophic cardiomyopathy                                           |
| hypertrophic cardiomyopathy and cytochrome c oxidase deficiency       |
| idiopathic deep venous thrombosis                                     |
| idiopathic pulmonary fibrosis                                         |
| increased cardiopulmonary morbidity                                   |
| increased vascular reactivity                                         |
| inherited cardiac arrhythmia long QT syndrome                         |
| intima media thickness                                                |
| intima-media thickness                                                |
| intima-media thickness myocardial infarct                             |
| intima-media thickness, carotid                                       |
| intima-media thickness; flow-mediated dilation of the brachial artery |
| intracranial aneurysms                                                |
| intracranial hemorrhage; white matter disease                         |
| ischemia                                                              |
| kawasaki disease                                                      |
| left ventricular dysfunction                                          |
| left ventricular hypertrophy                                          |
| left ventricular hypertrophy; blood pressure, arterial                |
| left ventricular mass                                                 |
| left ventricular mass ventricular remodeling                          |

|                                                                        |
|------------------------------------------------------------------------|
| left ventricular structure                                             |
| lipids; myocardial infarction                                          |
| lipoprotein triglycerides                                              |
| long QT syndrome                                                       |
| longevity                                                              |
| long-QT syndrome                                                       |
| matrix metalloproteinase-3 concentration myocardial infarct            |
| metabolic syndrome                                                     |
| microangiopathy, thrombotic                                            |
| microvascular function                                                 |
| mitral valve prolapse                                                  |
| mitral valve prolapse.                                                 |
| myocardial infarct                                                     |
| myocardial infarct stroke, ischemic                                    |
| myocardial infarct, mortality in                                       |
| myocardial infarct; atherosclerosis                                    |
| myocardial infarct; atherosclerosis, coronary                          |
| myocardial infarct; atherosclerosis, coronary; C-reactive protein      |
| myocardial infarct; cardiac death                                      |
| myocardial infarct; cardiovascular disease                             |
| myocardial infarct; carotid intima-media thickness                     |
| myocardial infarct; cerebrovascular infarct                            |
| myocardial infarct; diabetes, type 2                                   |
| myocardial infarct; heart disease, ischemic                            |
| myocardial infarct; heart disease, ischemic; atherosclerosis, coronary |
| myocardial infarct; heart failure                                      |
| myocardial infarct; kidney disease                                     |
| myocardial infarct; lipoprotein; cerebral infarct                      |
| myocardial infarct; stroke, atherothrombotic                           |
| myocardial infarct; stroke; angina; peripheral vascular disease        |
| myocardial infarct; thrombosis, deep vein                              |
| myocardial infarct; triglycerides                                      |
| myocardial infarction                                                  |
| myocardial infarction and stroke                                       |
| myocardial infarction; angina                                          |
| myocardial infarction; stable angina of effort                         |
| myocardial infarction; stroke                                          |
| myocardial infarction; sudden cardiac death                            |
| myocardial injury                                                      |
| myocardial ischemia                                                    |
| neuropathy                                                             |
| nonfamilial idiopathic dilated cardiomyopathy                          |
| nonfatal acute myocardial infarction                                   |
| nonfatal myocardial infarction.                                        |
| non-ST-elevation acute coronary syndromes                              |
| obesity                                                                |
| oxidized low-density lipoprotein and cardiolipin autoantibodies        |

|                                                                          |
|--------------------------------------------------------------------------|
| paraoxinase 1 activity                                                   |
| peripheral arterial disease                                              |
| peripheral demyelinating neuropathies                                    |
| peripheral vascular disease                                              |
| premature coronary artery disease                                        |
| premature coronary artery disease and familial hypoalphalipoproteinemia  |
| premature coronary artery disease.                                       |
| premature coronary heart disease.                                        |
| premature myocardial infarction in men.                                  |
| Progressive AV-block and anomalous venous return                         |
| pronounced septal hypertrophy                                            |
| proteinuria and cardiovascular disease                                   |
| psychiatric manifestations of velo-cardio-facial syndrome                |
| pulmonary arterial hypertension sclerosis, systemic                      |
| pulmonary fibrosis                                                       |
| pulmonary fibrosis sarcoidosis                                           |
| pulmonary fibrosis; Pigeon breeders disease                              |
| pulmonary function                                                       |
| pulmonary function; nitric oxide; Pseudomonas aeruginosa infection       |
| pulmonary hypertension                                                   |
| pulmonary hypertension; thrombosis, deep vein; pulmonary thromboembolism |
| pulmonary thromboembolism thromboembolism, venous                        |
| QT interval                                                              |
| radial artery hypertrophy                                                |
| recurrent coronary event                                                 |
| reduced risk of restenosis after coronary stenting                       |
| respiratory-distress syndrome                                            |
| restenosis                                                               |
| sclerosis, systemic                                                      |
| severe childhood thrombosis                                              |
| SIDS/sudden infant death syndrome                                        |
| sleep apnea                                                              |
| smoking                                                                  |
| Spinal cord infarction and recurrent venous thrombosis                   |
| stroke                                                                   |
| stroke, hemorrhagic stroke, ischemic                                     |
| stroke, ischemic                                                         |
| stroke, ischemic; cerebrovascular disease; thrombosis, arterial          |
| stroke, ischemic; fibrinogen                                             |
| stroke, ischemic; stroke, hemorrhagic                                    |
| stroke, lacunar                                                          |
| stroke, myocardial infarction                                            |
| stroke; atherosclerosis                                                  |
| stroke; dementia                                                         |
| stroke; fibrinogen                                                       |
| subarachnoid hemorrhage                                                  |
| subclinical carotid atherosclerosis                                      |

## CHEMDEPENDENCY

|                                                                            |
|----------------------------------------------------------------------------|
| Takayasu arteritis                                                         |
| Takayasu's arteritis                                                       |
| thromboembolism                                                            |
| thromboembolism, venous                                                    |
| thromboembolism, venous; homocysteine; thromboembolism, arterial           |
| thromboembolism, venous; protein C                                         |
| thrombosis                                                                 |
| thrombosis, deep vein                                                      |
| thrombosis, deep vein; Behcet's disease                                    |
| thrombosis, venous                                                         |
| thrombosis; antiphospholipid syndrome                                      |
| thoracic aortic aneurysm thoracic aortic dissection                        |
| transplant associated vasculopathy after cardiac transplantation           |
| Type II diabetes and hypertension                                          |
| unknown                                                                    |
| varicose ulcers                                                            |
| vascular disease                                                           |
| vascular endothelial growth factor                                         |
| vascular function; vascular morphology                                     |
| vascular NAD(P)H oxidase activity                                          |
| vasculitis, antineutrophil cytoplasmic; antibodies-associated small vessel |
| vasoconstriction, coronary                                                 |
| vasodilation during pregnancy                                              |
| vasodilation, flow-mediated                                                |
| vasopressor infusion requirement                                           |
| venous thromboembolism                                                     |
| venous thrombosis                                                          |
| ventricular arrhythmia, malignant                                          |
| X-linked dilated cardiomyopathy                                            |
| addiction to heroin                                                        |
| Alagille syndrome                                                          |
| alcohol abuse                                                              |
| alcohol abuse cirrhosis, alcoholic pancreatitis, chronic                   |
| alcohol abuse drug dependence                                              |
| alcohol abuse substance abuse                                              |
| alcohol abuse; blood pressure, arterial                                    |
| alcohol abuse; impulse control disorder                                    |
| alcohol abuse; neuroticism                                                 |
| alcohol abuse; nicotine dependence                                         |
| alcohol abuse; smoking behavior                                            |
| alcohol craving                                                            |
| alcohol dependence                                                         |
| alcohol dependence drug dependence                                         |
| alcohol dependence; cocaine dependence                                     |
| alcohol dependence; drug dependence                                        |

|                                                       |
|-------------------------------------------------------|
| alcohol dependency                                    |
| alcohol effects                                       |
| alcohol intake                                        |
| alcohol use                                           |
| alcohol withdrawal                                    |
| alcohol withdrawal alcoholism                         |
| alcohol withdrawal seizure and delirium tremens       |
| alcohol-dependence                                    |
| alcoholic liver disease                               |
| alcoholism                                            |
| alcoholism personality disorders                      |
| alcoholism; alcohol withdrawal                        |
| alcoholism; delirium tremens, alcohol-induced         |
| alcoholism; pancreatitis; pancreatitis, alcoholic     |
| alcoholism; renal disease, end stage                  |
| alcoholism-related traits                             |
| alcohol-related phenotypes nicotine                   |
| alcohol-withdrawal delirium                           |
| atriventricular block long QT syndrome                |
| caffeine consumption                                  |
| cirrhosis, alcoholic                                  |
| cocaine dependence                                    |
| cocaine dependence or abuse                           |
| cocaine dependence.                                   |
| cocaine dependence/abuse                              |
| delirium tremens, alcohol-induced; alcohol withdrawal |
| dopamine release                                      |
| drug abuse                                            |
| heroin abuse                                          |
| heroin addiction                                      |
| heroin dependence                                     |
| IgE                                                   |
| methamphetamine abuse                                 |
| methamphetamine abuse psychoses                       |
| methamphetamine abuse schizophrenia                   |
| methamphetamine abuse; psychoses                      |
| methamphetamine abuse; substance abuse                |
| methamphetamine dependence substance abuse            |
| naltrexone response in alcohol-dependent patients     |
| nicotine                                              |
| nicotine dependence                                   |
| nicotine dependence smoking behavior                  |
| nicotine smoking behavior                             |
| nicotine; personality trait                           |
| opiate dependence                                     |
| paranoia                                              |
| problem drug use                                      |

## DEVELOPMENTAL

|                                                                                           |
|-------------------------------------------------------------------------------------------|
| severity of alcohol dependence                                                            |
| smoking behavior                                                                          |
| smoking behavior; nicotine dependence                                                     |
| smoking cessation                                                                         |
| smoking cues                                                                              |
| substance abuse                                                                           |
| substance dependence                                                                      |
|                                                                                           |
| abnormal urogenital development                                                           |
| achondroplasia                                                                            |
| achromatopsia                                                                             |
| age of menarche                                                                           |
| agenesis of the corpus callosum                                                           |
| Axial skeletal defects                                                                    |
| Beckwith Wiedemann syndrome                                                               |
| bone size                                                                                 |
| cleft lip                                                                                 |
| cleft lip and palate                                                                      |
| cleft lip with cleft palate                                                               |
| cleft lip with cleft palate cleft lip without cleft palate                                |
| cleft lip with cleft palate cleft lip without cleft palate cleft palate                   |
| cleft lip with cleft palate; cleft lip without cleft palate                               |
| cleft lip with cleft palate; cleft lip without cleft palate; cleft palate                 |
| cleft lip with or without cleft palate                                                    |
| cleft lip with or without cleft palate; cleft palate, isolated                            |
| club foot                                                                                 |
| Coffin-Lowry syndrome.                                                                    |
| congenital adrenal hyperplasia                                                            |
| congenital adrenal hyperplasia (CAH)                                                      |
| congenital anomalies                                                                      |
| congenital anomalies; renal disease                                                       |
| congenital bilateral absence of the vas deferens                                          |
| congenital central hypoventilation syndrome                                               |
| congenital contractural arachnodactyly                                                    |
| cryptochidism                                                                             |
| cryptorchidism                                                                            |
| cryptorchidism.                                                                           |
| Down syndrome                                                                             |
| Familial spondyloepiphyseal dysplasia tarda, brachydactyly, and precocious osteoarthritis |
| fetal growth                                                                              |
| fragile X syndrome                                                                        |
| fragile X-associated tremor/ataxia syndrome                                               |
| haptoglobin development                                                                   |
| height                                                                                    |
| Hurler syndrome                                                                           |
| hypodontia                                                                                |

|                                                          |
|----------------------------------------------------------|
| hypospadias                                              |
| hypothyroidism; cleft palate, isolated; thyroid agenesis |
| isolated penile hypospadias                              |
| Left-right axis malformations                            |
| limb deficiency anomalies                                |
| Marfan phenotype                                         |
| Marfan syndrome                                          |
| mental disorder                                          |
| mental retardation                                       |
| micropenis                                               |
| multiple epiphyseal dysplasia                            |
| muscular dystrophy                                       |
| neural tube defects                                      |
| neural tube defects and preeclampsia                     |
| non-syndromic cleft lip and palate                       |
| Noonan syndrome                                          |
| omphalocele                                              |
| Peutz-Jeghers syndrome                                   |
| Peutz-Jegher's syndrome                                  |
| postnatal growth                                         |
| precocious puberty                                       |
| salt-wasting congenital adrenal hyperplasia              |
| small for gestational age                                |
| small-for-gestational-age                                |
| Swyer syndrome                                           |
| talipes equinovarus                                      |
| WAGR syndrome                                            |
|                                                          |
| agranulocytosis                                          |
| albuminuria                                              |
| albuminuria; fibrinogen                                  |
| anemia, aplastic                                         |
| anemia, iron deficiency                                  |
| anemia, malaria related; malaria, cerebral               |
| anemia; thrombocytopenic purpura, idiopathic             |
| aplastic anaemia                                         |
| aplastic anemia, acquired                                |
| Bernard-Soulier Syndrome                                 |
| bilirubin                                                |
| bleeding tendency                                        |
| blood and blood forming organ disorders                  |
| C2-deficiency gene                                       |
| C4gene deletion                                          |
| chronic hemolytic anemia                                 |
| chronic non-spherocytic haemolytic anaemia.              |
| coagulation disorder                                     |

## HEMATOLOGICAL

|                                                                                            |
|--------------------------------------------------------------------------------------------|
| coagulopathy                                                                               |
| factor V Leiden                                                                            |
| factor VII                                                                                 |
| factor VII levels                                                                          |
| factor VIII and factor IX genes                                                            |
| factor XII-deficient patients                                                              |
| fibrinogen                                                                                 |
| haptoglobin                                                                                |
| hematology indices                                                                         |
| hematopoietic progenitor cells, mobilization of                                            |
| hematopoietic stem cell transplantation                                                    |
| hemophilia                                                                                 |
| Increased platelet aggregability                                                           |
| Langerhans cell histiocytosis                                                              |
| malaria                                                                                    |
| neonatal thrombocytopenia                                                                  |
| over anticoagulation                                                                       |
| P1 blood group                                                                             |
| placental vascular complications                                                           |
| platelet aggregation; nitric oxide activity                                                |
| porphyria cutanea tarda                                                                    |
| sickle cell anemia                                                                         |
| thalassemia                                                                                |
| Thrombin activatable fibrinolysis inhibitor                                                |
| thrombin-activatable fibrinolysis inhibitor levels                                         |
| thrombocythemia                                                                            |
| thrombocytopenia                                                                           |
| thrombocytopenic purpura, immune                                                           |
| thrombophilia                                                                              |
| Vitamin D deficiency rickets                                                               |
|                                                                                            |
| acute anterior uveitis                                                                     |
| acute graft-versus-host disease                                                            |
| acute renal allograft rejection                                                            |
| acute respiratory distress syndrome IL* production                                         |
| Addison's disease                                                                          |
| Addison's disease diabetes, type 1 Graves' disease rheumatoid arthritis                    |
| Addison's disease Graves' disease                                                          |
| Addison's disease Graves' disease lupus erythematosus polyangitis Wegener's granulomatosis |
| Addison's disease; Graves' disease                                                         |
| allele frequency/ normal                                                                   |
| Allergic asthma                                                                            |
| allergic bronchopulmonary aspergillosis ABPA                                               |
| allergic disease                                                                           |
| allergic diseases                                                                          |

## IMMUNE



|                                                                                         |
|-----------------------------------------------------------------------------------------|
| Allergic diseases (bronchial asthma. atopic dermatitis and/or food-related anaphylaxis) |
| allergic rhinitis                                                                       |
| allergic rhinitis asthma                                                                |
| allergic rhinitis dermatitis and eczema fatty acid                                      |
| allergies                                                                               |
| allergies; common cold                                                                  |
| allergy                                                                                 |
| allergy asthma                                                                          |
| allergy dermatitis and eczema                                                           |
| allergy, latex; latex allergy                                                           |
| allograft dysfunction, renal                                                            |
| allograft outcome                                                                       |
| alopecia areata                                                                         |
| alzheimer`s Disease                                                                     |
| ANCA positive patients                                                                  |
| ankylosing spondylitis                                                                  |
| ankylosing spondylitis independent of HLA-B27                                           |
| anti-cyclic citrullinated peptide antibodies rheumatoid arthritis                       |
| anti-GAD65 antibody                                                                     |
| antineutrophil cytoplasmic antibody; (ANCA)-associated vasculitis                       |
| antiphospholipid syndrome                                                               |
| antiphospholipid syndrome thrombosis                                                    |
| anti-Ro 52-kd autoantibodies                                                            |
| arthritis                                                                               |
| arthritis lupus erythematosus                                                           |
| arthritis lymphopenia nephritis, lupus                                                  |
| arthritis, juvenile                                                                     |
| arthritis, psoriatic                                                                    |
| arthritis, rheumatoid                                                                   |
| arthritis; Familial Mediterranean Fever                                                 |
| Aspirin-induced asthma                                                                  |
| asthma                                                                                  |
| asthma (childhood)                                                                      |
| asthma and atopy                                                                        |
| asthma and IgE in childhood                                                             |
| asthma asthma, aspirin-intolerant                                                       |
| asthma atopy                                                                            |
| asthma atopy IgE                                                                        |
| asthma bronchodilator response IgE lung function                                        |
| asthma dermatitis and eczema                                                            |
| asthma eczema                                                                           |
| asthma IgE                                                                              |
| asthma IgE levels                                                                       |
| asthma IgE wheezing                                                                     |
| Asthma in men                                                                           |
| asthma respiratory syncytial virus                                                      |

|                                                          |
|----------------------------------------------------------|
| asthma rheumatoid arthritis                              |
| Asthma severity                                          |
| Asthma smokers                                           |
| asthma, aspirin-induced                                  |
| asthma, aspirin-intolerant                               |
| asthma, dust mite-sensitive                              |
| asthma.                                                  |
| Asthma. asthma severity                                  |
| Asthma. atopy                                            |
| Asthma. atopy. atopic dermatitis                         |
| Asthma. atopy. spIgE.                                    |
| Asthma. BHR. Total IgE. SPT                              |
| asthma. FEV(1)                                           |
| Asthma. FEV1                                             |
| Asthma. rhinitis                                         |
| asthma; allergic disease                                 |
| asthma; allergic disease, IgE mediated                   |
| asthma; allergic rhinitis                                |
| asthma; allergic rhinitis; atopic dermatitis             |
| asthma; allergies                                        |
| asthma; allergy                                          |
| asthma; aspirin intolerance                              |
| asthma; atopic dermatitis                                |
| asthma; atopy                                            |
| asthma; atopy; dermatitis and eczema                     |
| asthma; chronic obstructive pulmonary disease/COPD       |
| asthma; dermatitis and eczema                            |
| asthma; dermatitis and eczema; anaphylaxis, food-related |
| asthma; dermatitis and eczema; rhinitis                  |
| asthma; IgE                                              |
| asthma; respiratory syncytial virus; juvenile arthritis  |
| asthma; urticaria                                        |
| atherosclerosis, coronary                                |
| Atopic asthma                                            |
| atopic dermatitis                                        |
| atopic dermatitis.                                       |
| Atopic dermatitis. atopy                                 |
| atopic eczema                                            |
| Atopy                                                    |
| Atopy (IgE)                                              |
| Atopy (total & specific IgE)                             |
| atopy IgE urticaria, aspirin-intolerant                  |
| atopy. asthma. Netherton                                 |
| atopy; IgE levels                                        |
| atopy-susceptibility                                     |
| Autoimmune Hepatitis                                     |
| Autoimmune hepatitis type 1                              |

|                                                                       |
|-----------------------------------------------------------------------|
| autoimmune hypothyroidism                                             |
| autoimmune inflammatory disease                                       |
| autoimmune myasthenia gravis                                          |
| autoimmune pancreatitis                                               |
| autoimmune polyglandular syndrome                                     |
| autoimmune response                                                   |
| autoimmune thyroid disease                                            |
| autoimmune thyroid disease; thyroid disease, autoimmune               |
| autoimmune thyroiditis Graves' disease Hashimoto's thyroiditis        |
| autologous mixed lymphocyte reaction                                  |
| Behcet's disease                                                      |
| Behcet's disease thromboembolism, venous                              |
| Behcet's disease; vasculitis                                          |
| beta-cell function; diabetes, type 1                                  |
| betaCL osteocalcin                                                    |
| BHR                                                                   |
| bone marrow transplantation                                           |
| bronchial asthma                                                      |
| Bronchial asthma (childhood & adult)                                  |
| Bronchial asthma (childhood only)                                     |
| bronchial hyperresponsiveness                                         |
| bronchopulmonary dysplasia respiratory distress syndrome, neonatal    |
| bullous pemphigoid                                                    |
| CD14 expression                                                       |
| celiac                                                                |
| celiac disease                                                        |
| celiac disease lupus erythematosus rheumatoid arthritis               |
| cerebral malaria                                                      |
| childhood atopic asthma                                               |
| Chinese ankylosing spondylitis patients                               |
| cholangitis, sclerosing                                               |
| cholangitis, sclerosing Crohn's disease inflammatory bowel disease    |
| cholangitis, sclerosing Crohn's disease ulcerative colitis            |
| cholesterol, LDL; cholesterol, total; C-reactive protein; apoA2; apoB |
| chronic bronchitis                                                    |
| chronic GVHD                                                          |
| chronic immune thrombocytopenic purpura.                              |
| chronic obstructive pulmonary disease                                 |
| chronic obstructive pulmonary disease/COPD                            |
| chronic obstructive pulmonary disease/COPD; bronchiectatic disease    |
| chronic obstructive pulmonary disease/COPD; emphysema                 |
| chronic pancreatitis                                                  |
| chronic pancreatitis.                                                 |
| chronic periodontitis                                                 |
| chronic periodontitis.                                                |
| cirrhosis, biliary primary hepatitis, autoimmune                      |
| Coeliac                                                               |

|                                                                                                              |
|--------------------------------------------------------------------------------------------------------------|
| coeliac disease                                                                                              |
| collagen disease juvenile arthritis rheumatoid arthritis Still's disease                                     |
| Contact Allergy                                                                                              |
| contact hypersensitivity                                                                                     |
| Contact Sensitisation                                                                                        |
| C-reactive protein                                                                                           |
| C-reactive protein (CRP) concentration                                                                       |
| C-reactive protein glycation inflammation insulin oxidative stress prostaglandin tumor necrosis factor alpha |
| Crohn's disease                                                                                              |
| Crohn's disease and IBD                                                                                      |
| Crohn's disease and ulcerative colitis                                                                       |
| Crohn's disease inflammatory bowel disease ulcerative colitis                                                |
| Crohn's disease rheumatoid arthritis sclerosis, systemic                                                     |
| Crohn's disease ulcerative colitis                                                                           |
| Crohn's disease ulcerative colitis,Crohn's disease                                                           |
| Crohn's disease; ulcerative colitis                                                                          |
| Crohn's disease; ulcerative colitis; inflammatory bowel disease                                              |
| Decreased airway responsiveness                                                                              |
| dermatitis and eczema                                                                                        |
| dermatitis herpetiformis.                                                                                    |
| dermatitis, atopic                                                                                           |
| dermatomyositis/ polymyositis                                                                                |
| diabetes, latent autoimmune                                                                                  |
| diabetes, type 1                                                                                             |
| diabetes, type 1 diabetes, type 2 diabetic nephropathy retinopathy, diabetic                                 |
| diabetes, type 1 diabetic nephropathy                                                                        |
| diabetes, type 1 juvenile arthritis                                                                          |
| diabetes, type 1 rheumatoid arthritis                                                                        |
| diabetes, type 1 thyroid autoimmunity                                                                        |
| diabetes, type 1 Vitamin D                                                                                   |
| diabetes, type 1; Addison's disease                                                                          |
| diabetes, type 1; Addison's disease; Graves' disease; thyroiditis, chronic lymphocytic                       |
| diabetes, type 1; blood group incompatibility                                                                |
| diabetes, type 1; carotid atherosclerosis                                                                    |
| diabetes, type 1; celiac disease                                                                             |
| diabetes, type 1; IL-1RI                                                                                     |
| diabetes, type 1; nephropathy in other diseases                                                              |
| diabetes, type 2                                                                                             |
| diabetes-associated autoantibodies                                                                           |
| DRS                                                                                                          |
| early onset of multiple sclerosis.                                                                           |
| early onset periodontitis                                                                                    |
| early polyarthritis                                                                                          |
| eczema                                                                                                       |
| emphysema                                                                                                    |

|                                                                         |
|-------------------------------------------------------------------------|
| EO                                                                      |
| eosinophilia                                                            |
| familial mediterranean fever                                            |
| FEV1                                                                    |
| Fuchs heterochromic cyclitis                                            |
| glomerulonephritis, Hepatitis B virus-associated                        |
| graft occlusion, atherosclerotic                                        |
| graft versus host disease                                               |
| graft-versus-host disease                                               |
| Grave`s disease                                                         |
| Graves disease                                                          |
| Graves' disease                                                         |
| Graves' disease Hashimoto's thyroiditis                                 |
| Graves' disease Hashimoto's thyroiditis                                 |
| Graves' disease IgE                                                     |
| Graves' disease myasthenia gravis                                       |
| Graves' disease; Hashimoto's thyroiditis                                |
| Graves' disease; ophthalmopathy, Graves'                                |
| Graves' disease; thyroiditis, chronic lymphocytic                       |
| Graves' hyperthyroidism                                                 |
| GVHD                                                                    |
| Haemophilia with Chronic synovitis                                      |
| Hashimoto's thyroiditis                                                 |
| hematology indices                                                      |
| hepatitis type 2, autoimmune                                            |
| hepatitis, autoimmune                                                   |
| high interleukin-1 beta plasma levels                                   |
| HIV-1 infection                                                         |
| Host defense and inflammatory outcomes                                  |
| H-Thyroiditis                                                           |
| hyper-IgE syndrome and severe eczema. atopy                             |
| Hyper-IgE syndrome. severe eczema. atopy                                |
| hyper-IgM syndrome can form oligomers and trigger CD40-mediated signals |
| Hyperresponsiveness                                                     |
| hypothyroidism, autoimmune                                              |
| hypothyroidism, goitrous juvenile autoimmune                            |
| idiopathic chronic pancreatitis                                         |
| IgA deficiency                                                          |
| IgA nephropathy                                                         |
| IgD                                                                     |
| IgE                                                                     |
| IgE levels                                                              |
| IgE response                                                            |
| IgE response IgG                                                        |
| IgE, cord blood                                                         |
| IgE. SPT                                                                |
| IGF-I                                                                   |

|                                                                                                      |
|------------------------------------------------------------------------------------------------------|
| IGF-I levels; IGFBP-3 levels                                                                         |
| IL-18 concentration physical functioning                                                             |
| IL18 expression level                                                                                |
| IL-18 lupus erythematosus                                                                            |
| IL-4                                                                                                 |
| IL-4 production                                                                                      |
| Increased expression of the G gamma and A gamma globin                                               |
| Increased IgE                                                                                        |
| increased interleukin-10 (IL-10) plasma levels                                                       |
| inflammation                                                                                         |
| inflammatory bowel disease                                                                           |
| inflammatory bowel disease/UC                                                                        |
| inflammatory myopathies                                                                              |
| inflammatory response                                                                                |
| inflammatory response in coronary bypass                                                             |
| inflammatory urogenital disease                                                                      |
| interferon response                                                                                  |
| interleukin-1 beta (IL-1 beta) synthesis capacity                                                    |
| irritable bowel syndrome                                                                             |
| juvenile arthritis                                                                                   |
| juvenile idiopathic arthritis                                                                        |
| kawasaki disease                                                                                     |
| kidney transplant                                                                                    |
| kidney transplant complications                                                                      |
| latex allergy                                                                                        |
| latex-fruit syndrome                                                                                 |
| lep. Leprosy                                                                                         |
| leukemia virus type I                                                                                |
| Lupus                                                                                                |
| lupus erythematosus                                                                                  |
| lupus erythematosus multiple sclerosis                                                               |
| lupus erythematosus periodontitis                                                                    |
| lupus erythematosus; nephritis, lupus                                                                |
| lupus erythematosus; nephropathy in other diseases                                                   |
| lupus erythematosus; periodontitis                                                                   |
| lupus erythematosus; rheumatoid arthritis                                                            |
| lupus erythematosus; rheumatoid arthritis; cholangitis, sclerosing; celiac disease; juvenile arthrit |
| lupus erythematosus; rheumatoid arthritis; Sjogren's syndrome                                        |
| lupus erythematosus; rheumatoid arthritis; Sjogren's syndrome; tuberculosis                          |
| lupus erythematosus; sclerosis, systemic                                                             |
| Lupus Nephritis                                                                                      |
| malaria, cerebral                                                                                    |
| microscopic polyangiitis                                                                             |
| Mite-sensitive asthma                                                                                |
| multiple sclerosis                                                                                   |
| multiple sclerosis rheumatoid arthritis                                                              |

|                                                            |
|------------------------------------------------------------|
| multiple sclerosis(PPmultiple sclerosis)                   |
| myasthenia gravis                                          |
| myelopathy, HTLV-1 associated                              |
| nephritis, lupus; glomerular microthrombus                 |
| nephropathy in other diseases                              |
| nephropathy, diabetic; diabetes, type 1                    |
| nephropathy, IgA                                           |
| neutrophil immunodeficiency syndrome                       |
| nitric oxide, exhaled                                      |
| Nocturnal asthma                                           |
| nonatopic asthma and food allergy                          |
| Normal volunteers                                          |
| nut allergy                                                |
| osteomyelitis                                              |
| pancreatitis                                               |
| pancreatitis, acute pancreatitis, chronic                  |
| pancreatitis, autoimmune                                   |
| pancreatitis, autoimmune; pancreatitis, chronic calcifying |
| pancreatitis, chronic                                      |
| pancreatitis, tropical calcific                            |
| pemphigus                                                  |
| pemphigus foliaceus                                        |
| pemphigus vulgaris                                         |
| periodontal disease                                        |
| periodontitis                                              |
| periodontitis, early-onset                                 |
| Physician diagnosed asthma                                 |
| pneumoconiosis                                             |
| pollen allergy                                             |
| pollen-induced allergic rhinitis                           |
| polymyositis; dermatomyositis                              |
| postoperative systemic inflammatory reaction               |
| Primary Biliary Cirrhosis                                  |
| Primary Billiary Cirrosis                                  |
| Primary Sclerosing Cholangitis                             |
| psoriasis                                                  |
| psoriasis psoriatic arthritis                              |
| psoriasis; dermatitis and eczema                           |
| psoriatic arthritis                                        |
| purpura, allergic                                          |
| reactive arthritis                                         |
| Reiter's syndrome                                          |
| renal disease                                              |
| retinopathy, diabetic; nephropathy in other diseases       |
| rheumatic diseases                                         |
| rheumatic fever                                            |
| rheumatic heart disease                                    |

|                                                                     |
|---------------------------------------------------------------------|
| rheumatoid arthritis                                                |
| rheumatoid arthritis thyroid disease, autoimmune                    |
| rheumatoid arthritis; celiac disease                                |
| rheumatoid arthritis; Crohn's disease; systemic lupus erythematosus |
| rheumatoid arthritis; juvenile arthritis                            |
| rhinitis                                                            |
| rickets                                                             |
| sarcoidosis                                                         |
| sarcoidosis uveitis                                                 |
| sarcoidosis; tuberculosis                                           |
| scleroderma                                                         |
| sclerosis, systemic                                                 |
| Seiple rabies vaccine-induced autoimmune encephalomyelitis          |
| Sepsis                                                              |
| Septic Shock                                                        |
| serum IgE levels                                                    |
| severe ulcerative colitis                                           |
| silicosis                                                           |
| Sjogren's syndrome                                                  |
| Sjogren's syndrome                                                  |
| Sjogren's syndrome; purpura                                         |
| SLE                                                                 |
| spondyloarthropathies                                               |
| SPT                                                                 |
| SPT (cockroach)                                                     |
| SPT (HDM)                                                           |
| staphylococcal infection                                            |
| Steroid-requiring asthma in sedentary women                         |
| Stevens-Johnson syndrome                                            |
| Still's disease                                                     |
| sulfasalazine, adverse effects of                                   |
| susceptibility to autoimmune disease                                |
| systemic inflammatory hyporesponsiveness                            |
| systemic inflammatory response syndrome                             |
| systemic juvenile idiopathic arthritis                              |
| systemic lupus erythematosus                                        |
| Systemic Lupus Erythematosus (SLE)                                  |
| systemic lupus erythematosus; arthritis, rheumatoid                 |
| systemic lupus erythematosus; lupus nephritis                       |
| Systemic responsiveness to lipopolysaccharide                       |
| systemic scleroderma                                                |
| systemic sclerosis                                                  |
| thimerosal sensitization                                            |
| thrombosis, deep vein; Behcet's disease                             |
| thyroiditis, chronic lymphocytic                                    |
| thyroid autoimmunity                                                |
| thyroiditis, chronic lymphocytic                                    |



## INFECTION

|                                                             |
|-------------------------------------------------------------|
| thyroiditis, Hashimoto's                                    |
| tIgE                                                        |
| Total IgE                                                   |
| Total IgE. atopic asthma                                    |
| Total IgE. Eosinophilia. DRS                                |
| Total IgE. SPT. FEV1                                        |
| Total serum IgE                                             |
| total serum IgE levels                                      |
| Total serum IgE. atopic dermatitis                          |
| Total serum IgE. specific IgE. AR                           |
| Tropical calcific pancreatitis                              |
| Tumor necrosis factor receptor-associated periodic syndrome |
| type 1 diabetes                                             |
| ulcerative colitis                                          |
| ulcerative colitis and Crohn's disease                      |
| ulcerative colitis; cholangitis, sclerosing                 |
| ulcerative colitis; inflammatory bowel disease              |
| vitiligo                                                    |
| vitiligo; autoimmune disease                                |
| Vogt-Koyanagi-Harada syndrome                               |
| Vogt-Koyanagi-Harada's disease                              |
| X-linked lymphoproliferative disease                        |
|                                                             |
| acne                                                        |
| AIDS                                                        |
| alveolar echinococcosis                                     |
| appendicitis                                                |
| aspergillosis                                               |
| bacteremia                                                  |
| bacterial infection                                         |
| bacterial vaginosis                                         |
| bronchitis; pneumonia                                       |
| brucellosis                                                 |
| Candida                                                     |
| cerebral malaria                                            |
| cervical cancer                                             |
| cervical dysplasia H. pylori infection                      |
| Chagas disease                                              |
| Chlamydia                                                   |
| Chlamydia pneumoniae infection                              |
| chronic active hepatitis C infection.                       |
| chronic hepatitis C                                         |
| cirrhosis hepatitis C, chronic                              |
| clinical tuberculosis                                       |
| Clostridium difficile toxin-induced diarrhea                |
| C-reactive protein Streptococcus pneumoniae                 |

|                                                                       |
|-----------------------------------------------------------------------|
| cystic fibrosis; P. aeruginosa infection                              |
| cytomegalovirus                                                       |
| cytomegalovirus leukemia                                              |
| dengue disease                                                        |
| dengue hemorrhagic fever                                              |
| duodenal ulcer gastritis                                              |
| echinococcosis                                                        |
| febrile seizures                                                      |
| fibrosis hepatitis C, chronic                                         |
| gastric atrophy H. pylori infection                                   |
| graft-versus-host disease                                             |
| H. pylori infection                                                   |
| HCV infection                                                         |
| Helicobacter pylori cagA subtype infection                            |
| Helicobacter pylori infection                                         |
| Helicobacter pylori infection; gastritis, Helicobacter pylori-induced |
| hepatitis                                                             |
| hepatitis A vaccination, humoral immune response                      |
| hepatitis B                                                           |
| hepatitis B, chronic                                                  |
| hepatitis B, intrauterine                                             |
| hepatitis C                                                           |
| hepatitis C infection                                                 |
| hepatitis C virus infection                                           |
| hepatitis C, chronic                                                  |
| hepatitis C; hepatitis B                                              |
| hepatitis E                                                           |
| hepatitis, fulminant non-A, nonB                                      |
| herpesvirus, Kaposi sarcoma-associated                                |
| HIV                                                                   |
| HIV disease                                                           |
| HIV disease progression                                               |
| HIV infection                                                         |
| HIV; cytomegalovirus retinitis                                        |
| HIV; pneumocystis carinii pneumonia                                   |
| HIV; sclerosis, systemic                                              |
| HIV-1                                                                 |
| HIV-1 disease                                                         |
| HTLV-1 associated myelopathy/tropical spastic; paraparesis            |
| HTLV-1 infection                                                      |
| human papillomavirus infection                                        |
| interstitial cystitis                                                 |
| kidney transplant                                                     |
| Legionnaire's disease                                                 |
| Leishmania chagasi infection                                          |
| leishmaniasis, cutaneous                                              |
| leprosy                                                               |

|                                                     |
|-----------------------------------------------------|
| leprosy tuberculosis                                |
| leprosy type                                        |
| liver disease                                       |
| lung function                                       |
| malaria                                             |
| Malaria infection                                   |
| malaria, cerebral                                   |
| malaria, plasmodium falciparum                      |
| malaria; hypoglycemia; hyperparasitemia             |
| malaria; schistosomiasis                            |
| malarial anemia and cerebral malaria                |
| measles antibody level                              |
| meningococcal disease                               |
| meningococcal disease.                              |
| microscopy-positive tuberculosis                    |
| mucocutaneous leishmaniasis                         |
| multiorgan failure septic shock mortality           |
| neonatal infection                                  |
| neonatal sepsis                                     |
| Nonsurvivors of sepsis (male only)                  |
| ocular Chlamydia trachomatis infection              |
| ovalocytosis and malaria susceptibility             |
| pancreatic necrosis pancreatitis, acute             |
| papillomavirus infection                            |
| Parasitic infection                                 |
| parvovirus                                          |
| parvovirus B19 infection                            |
| placental malaria                                   |
| Plasmodium falciparum reinfections                  |
| pneumococcal empyema pneumonia                      |
| pneumoconiosis, coal workers'                       |
| pneumoconiosis, coal workers' silicosis             |
| pneumonia                                           |
| Postoperative infectious complications              |
| posttreatment Th2 immune response to S. mansoni Ags |
| Progression to AIDS                                 |
| pulmonary tuberculosis                              |
| pyelonephritis vesicoureteral reflux                |
| respiratory syncytial virus                         |
| respiratory syncytial virus disease                 |
| respiratory syncytial virus infection               |
| ricketts                                            |
| SARS (severe acute respiratory syndrome)            |
| SARS infection                                      |
| schistosomal worm antigen                           |
| sepsis                                              |
| sepsis; lung injury, acute                          |

## METABOLIC

|                                                                                             |
|---------------------------------------------------------------------------------------------|
| sepsis; pneumonia; acute respiratory distress syndrome                                      |
| sepsis; serum tumor necrosis factor-alpha levels                                            |
| sepsis; systemic inflammatory response syndrome                                             |
| Septic Shock                                                                                |
| severe acute respiratory syndrome                                                           |
| severe malaria                                                                              |
| severe RSV bronchiolitis                                                                    |
| Severe sepsis                                                                               |
| Severe sepsis/nonsurvival                                                                   |
| susceptibility or resistance to immunodeficiency virus type 1 infection                     |
| susceptibility to tuberculosis                                                              |
| trypanosomiasis                                                                             |
| tuberculoid type of leprosy                                                                 |
| tuberculosis                                                                                |
| tuberculosis disease                                                                        |
| tuberculosis meningitis                                                                     |
| tuberculosis tumor necrosis factor-alpha                                                    |
| typhoid fever                                                                               |
| urinary tract infection                                                                     |
| vaginal micro-flora                                                                         |
| viral clearance                                                                             |
| 1-hydroxypyrene, urinary                                                                    |
| 1-hydroxypyrene glucuronide concentrations                                                  |
| 2-Amino-1-methyl-6-phenylimidazo[4,5-b]pyridine                                             |
| abdominal fat fatty acid glucose tolerance insulin lipids prostaglandin                     |
| acid lipase deficiency and cholesterol ester storage disease                                |
| adipocyte size, large subcutaneous abdominal                                                |
| adiponectin                                                                                 |
| adiponectin glucose insulin lipids                                                          |
| adiponectin hypertension plasminogen activator inhibitor-1                                  |
| adiponectin insulin                                                                         |
| adipose tissue lipoprotein lipase activity and lipoprotein lipid and glucose concentrations |
| Adiposity and Abdominal Obesity                                                             |
| adrogen body mass insulin polycystic ovary syndrome                                         |
| adult height urinary pyridinoline excretion                                                 |
| aerobic exercise capacity                                                                   |
| age-related skeletal disorders                                                              |
| albumin bone density calcium fractures, vertebral hyperparathyroidism kidney stone disease  |
| albuminuria                                                                                 |
| albuminuria among aboriginal Australians                                                    |
| albuminuria hypertension                                                                    |
| aldosterone                                                                                 |
| aldosterone angiotensin II hypertension                                                     |
| aldosterone blood pressure, arterial kidney function left ventricular function              |

|                                                                      |
|----------------------------------------------------------------------|
| aldosterone hypertension                                             |
| aldosterone responsiveness to angiotensin                            |
| aldosterone responsiveness to the renin-angiotensin system           |
| alpha-2-macroglobulin concentration obesity                          |
| altered B vitamin/thiol metabolism                                   |
| altered lipid levels                                                 |
| altered lipid oxidation and early insulin secretion                  |
| amitriptyline metabolism                                             |
| amitriptyline; nortriptyline                                         |
| amyloidosis                                                          |
| amyloidosis Familial Mediterranean Fever                             |
| amyloidosis; Familial Mediterranean Fever                            |
| androgen                                                             |
| androgen deprivation therapy response prostate specific antigen      |
| androgen insensitivity syndrome                                      |
| angiotensinogen concentrations                                       |
| ANS function                                                         |
| anthropometric and metabolic traits, relative to cardiovascular risk |
| anthropometric parameters diabetes, type 2 insulin                   |
| anti-atherogenic lipoprotein profile                                 |
| anticoagulant complications                                          |
| anticoagulant complications; bleeding complications                  |
| antilipolytic insulin sensitivity                                    |
| antioxidant status                                                   |
| antipsychotic agent-induced weight gain                              |
| ApoA5 diabetes, type 2 triglycerides                                 |
| apolipoprotein A-I levels                                            |
| atherosclerosis                                                      |
| BCHE serum levels                                                    |
| benzene toxicity                                                     |
| beta-cell function                                                   |
| beta-cell function; insulin                                          |
| biliary atresia                                                      |
| bilirubin; hemolysis                                                 |
| bilirubin; irinotecan pharmacogenetics                               |
| birth weight                                                         |
| birth weight body mass                                               |
| birth weight glucose                                                 |
| birth weight hypoglycemia                                            |
| bleeding complications                                               |
| blood pressure                                                       |
| BMI                                                                  |
| body composition                                                     |
| body composition changes                                             |
| body fat                                                             |
| body fat body mass diabetes, type 2 lipoprotein                      |
| body fat distribution                                                |

|                                                                                                               |
|---------------------------------------------------------------------------------------------------------------|
| body fat leptin                                                                                               |
| body fat; insulin resistance                                                                                  |
| body height                                                                                                   |
| body mass                                                                                                     |
| body mass bone density muscle testing                                                                         |
| body mass bulimia harm avoidance personality disorders                                                        |
| body mass cholesterol cholesterol, HDL diabetes, type 2 leptin                                                |
| body mass cholesterol, HDL                                                                                    |
| body mass cholesterol, HDL diabetes, type 2 glucose insulin metabolic syndrome triglycerides                  |
| body mass cholesterol, HDL food consumption lipids                                                            |
| body mass cholesterol, LDL glucose insulin                                                                    |
| body mass diabetes, type 2 insulin                                                                            |
| body mass diabetes, type 2 triglycerides                                                                      |
| body mass energy metabolism                                                                                   |
| body mass fatty acid glucose tolerance lipoprotein                                                            |
| body mass glucose tolerance glycemia insulin                                                                  |
| body mass glucose tolerance glycemia obesity, localized                                                       |
| body mass height weight gain                                                                                  |
| Body Mass Index                                                                                               |
| body mass index and waist circumference                                                                       |
| body mass insulin                                                                                             |
| body mass insulin waist circumference                                                                         |
| body mass leptin obesity                                                                                      |
| body mass leptin obesity, localized                                                                           |
| body mass metabolic rate                                                                                      |
| body mass metabolic syndrome                                                                                  |
| body mass obesity                                                                                             |
| body mass obesity triglycerides                                                                               |
| body mass paraoxonase activity polycystic ovary syndrome                                                      |
| body mass; adiposity                                                                                          |
| body mass; cholesterol, HDL; blood pressure                                                                   |
| body mass; cholesterol, HDL; insulin; folate; homocysteine                                                    |
| body mass; cholesterol, HDL; triglycerides; diabetes, type 2; cholesterol, LDL; hypertension; atherosclerosis |
| body mass; cholesterol, LDL; cholesterol, total; insulin; apoB                                                |
| body mass; cholesterol; cholesterol, HDL; triglycerides; blood pressure; insulin resistance                   |
| body mass; cholesterol; diabetes, type 2; blood pressure                                                      |
| body mass; cholesterol; triglycerides; blood pressure                                                         |
| body mass; diabetes, type 2                                                                                   |
| body mass; diabetes, type 2; energy expenditure                                                               |
| body mass; diabetes, type 2; glucose tolerance; insulin                                                       |
| body mass; diabetes, type 2; insulin; glucose; HbA(1c)                                                        |
| body mass; glucose                                                                                            |
| body mass; glucose tolerance; insulin; lipids; blood pressure, arterial; heart rate; autonomic nervous system |

|                                                                                                                |
|----------------------------------------------------------------------------------------------------------------|
| body mass; glucose tolerance; insulin; obesity                                                                 |
| body mass; glucose; insulin secretion                                                                          |
| body mass; hemoglobin A(1c)                                                                                    |
| body mass; hypertension; insulin sensitivity                                                                   |
| body mass; insulin                                                                                             |
| body mass; insulin sensitivity                                                                                 |
| body mass; insulin; glucose                                                                                    |
| body mass; insulin; glucose; nervous system activity                                                           |
| body mass; insulin; lipids; obesity                                                                            |
| body mass; insulin; lipids; obesity; glucose; blood pressure; cortisol, salivary; leptin; leptin; testosterone |
| body mass; leptin                                                                                              |
| body mass; leptin; fat mass                                                                                    |
| body mass; lipids                                                                                              |
| body mass; muscle testing; IGF-I                                                                               |
| body mass; obesity                                                                                             |
| body mass; triglycerides; blood pressure, arterial                                                             |
| Body Weight                                                                                                    |
| body weight height limb length                                                                                 |
| Body Weight Regulation                                                                                         |
| body weight; seasonal affective disorder                                                                       |
| bone characteristics                                                                                           |
| bone density                                                                                                   |
| bone density and spondylosis                                                                                   |
| bone density but not spondylosis                                                                               |
| bone density dehydroepiandrosterone sulphate osteoporosis                                                      |
| bone density dihydrotestosterone estradiol sex hormone binding globulin testosterone                           |
| bone density fracture risk                                                                                     |
| bone density fracture risk osteoporosis, postmenopausal                                                        |
| bone density fractures, vertebral                                                                              |
| bone density fractures, vertebral osteoporosis, postmenopausal                                                 |
| bone density height                                                                                            |
| bone density osteoarthritis osteoporosis                                                                       |
| bone density osteocalcin                                                                                       |
| bone density; calcium; fractures, nonvertebral; milk intolerance                                               |
| bone density; fractures                                                                                        |
| bone density; fractures, vertebral                                                                             |
| bone density; height                                                                                           |
| bone density; height; PTH; pyridinoline, urinary                                                               |
| bone density; muscle strength                                                                                  |
| bone density; osteoporosis                                                                                     |
| bone density; spondylosis, lumbar                                                                              |
| bone density; tricho-dento-osseous syndrome                                                                    |
| bone fractures                                                                                                 |
| bone loss                                                                                                      |
| bone marrow transplant                                                                                         |

|                                                                                              |
|----------------------------------------------------------------------------------------------|
| bone mass                                                                                    |
| bone mass IGF-I levels sex steroid hormones                                                  |
| bone mass; osteoporotic fractures                                                            |
| bone metastases                                                                              |
| bone mineral density                                                                         |
| bone mineral density (BMD)                                                                   |
| bone mineral density (BMD) / quantitative ultra sound (QUS)                                  |
| Bone mineral mass                                                                            |
| Bone Mineralization                                                                          |
| calcium                                                                                      |
| Calcium Nephrolithiasis                                                                      |
| carotid artery damage                                                                        |
| catalase activity                                                                            |
| central adiposity                                                                            |
| cholesterol absorption                                                                       |
| cholangitis, sclerosing                                                                      |
| cholelithiasis                                                                               |
| cholelithiasis; bilirubin                                                                    |
| cholestasis                                                                                  |
| cholestasis; biliary atresia                                                                 |
| cholesterol                                                                                  |
| cholesterol cholesterol, HDL cholesterol, LDL                                                |
| cholesterol cholesterol, HDL cholesterol, LDL cholesterol, VLDL lipoprotein triglycerides    |
| cholesterol cholesterol, HDL cholesterol, LDL triglycerides                                  |
| cholesterol cholesterol, LDL diabetes, type 2 insulin triglycerides                          |
| cholesterol cholesterol, LDL fibrinogen lipoprotein myocardial infarct nitrate triglycerides |
| cholesterol cholesterol, LDL lipids lipoprotein                                              |
| cholesterol cholesterol, LDL triglycerides                                                   |
| cholesterol heart disease, ischemic                                                          |
| cholesterol metabolic syndrome triglycerides                                                 |
| cholesterol status                                                                           |
| cholesterol, HDL                                                                             |
| cholesterol, HDL cholesterol, LDL                                                            |
| cholesterol, HDL hypertriglyceridemia triglycerides                                          |
| cholesterol, HDL obesity                                                                     |
| cholesterol, HDL triglycerides                                                               |
| cholesterol, HDL; arterial-wall changes; cholesterol efflux                                  |
| cholesterol, HDL; atherosclerosis, coronary                                                  |
| cholesterol, HDL; cholesterol, LDL                                                           |
| cholesterol, HDL; cholesterol, LDL; apoA1; apoB                                              |
| cholesterol, HDL; cholesterol, LDL; cholesterol, total; apoA1; apoE; apoB-100                |
| cholesterol, HDL; cholesterol, total; insulin; cortisol                                      |
| cholesterol, HDL; cholesteryl ester transfer protein                                         |
| cholesterol, HDL; C-reactive protein; carotid intima-media thickness                         |
| cholesterol, HDL; hypertension                                                               |



|                                                                                                                    |
|--------------------------------------------------------------------------------------------------------------------|
| cholesterol, HDL; lipids                                                                                           |
| cholesterol, HDL; lipoprotein, LDL                                                                                 |
| cholesterol, HDL; triglycerides                                                                                    |
| cholesterol, HDL; triglycerides; adiposity                                                                         |
| cholesterol, HDL; triglycerides; cholesterol, LDL                                                                  |
| cholesterol, HDL; triglycerides; cholesterol, LDL; cholesterol, total; glucose                                     |
| cholesterol, HDL; triglycerides; cholesterol, LDL; lipoprotein; fatty acid; uric acid                              |
| cholesterol, HDL; triglycerides; coronary heart disease; cholesterol, LDL; cholesterol, total                      |
| cholesterol, HDL; triglycerides; lipids                                                                            |
| cholesterol, HDL; triglycerides; personality trait                                                                 |
| cholesterol, LDL                                                                                                   |
| cholesterol, LDL sPLA2-IIA mass                                                                                    |
| cholesterol, LDL,cholesterol, LDL hypercholesterolemia                                                             |
| cholesterol, LDL; cholesterol, total                                                                               |
| cholesterol, LDL; cholesterol, total; apolipoproteins                                                              |
| cholesterol, LDL; C-reactive protein; triacylglycerol                                                              |
| cholesterol, LDL; hypertension; C-reactive protein; fibrinogen; homocysteine; white blood cell count               |
| cholesterol, LDL; insulin; metabolism disorders                                                                    |
| cholesterol, LDL; lipoproteins                                                                                     |
| cholesterol, total                                                                                                 |
| cholesterol; cholesterol, HDL; cholesterol, LDL; hypertension; lipoproteins; obesity                               |
| cholesterol; cholesterol, HDL; lipoprotein, LDL; triglycerides; hypertension                                       |
| cholesterol; cholesterol, HDL; lipoprotein; lipids                                                                 |
| cholesterol; cholesterol, LDL                                                                                      |
| cholesterol; cholesterol, LDL; campesterol; sitosterol                                                             |
| cholesterol; cholesterol, LDL; carotid atherosclerosis                                                             |
| cholesterol; cholesterol, LDL; lipoproteins; fatty acid                                                            |
| cholesterol; diabetes, type 2                                                                                      |
| cholesterol; diabetes, type 2; hypertension; nephropathy, diabetic; albuminuria                                    |
| cholesterol; diabetes, type 2; insulin; glucose; insulin resistance; PC-1 protein content; systolic blood pressure |
| cholesterol; hypercholesterolemia; cholesterol, LDL; hypertriglyceridemia                                          |
| cholesterol; insulin; obesity; blood pressure                                                                      |
| cholesterol; lathosterol                                                                                           |
| cholesterol; triglycerides                                                                                         |
| cholesterol; triglycerides; diabetes, type 2; obesity                                                              |
| cholesterol; triglycerides; obesity                                                                                |
| cholesteryl ester storage disease                                                                                  |
| cholesteryl ester transfer protein                                                                                 |
| chondrocalcinosis                                                                                                  |
| chronic symptoms in pesticide-exposed workers                                                                      |
| coke-oven toxicity                                                                                                 |
| Colon Cancer                                                                                                       |

|                                                                                                             |
|-------------------------------------------------------------------------------------------------------------|
| combined bone mass                                                                                          |
| combined pituitary hormone deficiency                                                                       |
| coronary artery disease                                                                                     |
| cortisol                                                                                                    |
| cortisol escape from dexamethasone and elevated glucose levels                                              |
| cortisol response to opioid blockade                                                                        |
| C-reactive protein cholesterol, HDL insulin                                                                 |
| creatinine; protein excretion, urinary                                                                      |
| CYP2A6 poor metabolizer phenotype                                                                           |
| CYP2D6 poor metabolizer phenotype                                                                           |
| cystinuria                                                                                                  |
| decreased bone mass in patients                                                                             |
| diabetes                                                                                                    |
| diabetes mellitus                                                                                           |
| diabetes mellitus type I                                                                                    |
| Diabetes Mellitus. Obesity. and Lipaemia                                                                    |
| diabetes or impaired glucose tolerance                                                                      |
| diabetes, gestational                                                                                       |
| diabetes, gestational insulin                                                                               |
| diabetes, neurological manifestations                                                                       |
| diabetes, type 1                                                                                            |
| diabetes, type 1 diabetes, type 2                                                                           |
| diabetes, type 2                                                                                            |
| diabetes, type 2 fatty acid triglycerides                                                                   |
| diabetes, type 2 ghrelin insulin                                                                            |
| diabetes, type 2 glucose insulin                                                                            |
| diabetes, type 2 glucose insulin obesity                                                                    |
| diabetes, type 2 glucose tolerance                                                                          |
| diabetes, type 2 hypertension                                                                               |
| diabetes, type 2 hypertension intima-media thickness mortality                                              |
| diabetes, type 2 insulin                                                                                    |
| diabetes, type 2 insulin metabolic syndrome                                                                 |
| diabetes, type 2 kidney failure, chronic                                                                    |
| diabetes, type 2 metabolic syndrome                                                                         |
| diabetes, type 2 metabolism syndrome                                                                        |
| diabetes, type 2 obesity                                                                                    |
| diabetes, type 2 plasminogen activator inhibitor type 1 levels                                              |
| diabetes, type 2 retinopathy, diabetic                                                                      |
| diabetes, type 2 rheumatoid arthritis                                                                       |
| diabetes, type 2 sleep apnea                                                                                |
| diabetes, type 2; atherosclerosis, generalized                                                              |
| diabetes, type 2; body fat; lipid metabolism                                                                |
| diabetes, type 2; cardiovascular disease; birth weight                                                      |
| diabetes, type 2; cholesterol, LDL; glucose tolerance; blood pressure, arterial; glycosylated hemoglobin A1 |
| diabetes, type 2; diabetes, type 1                                                                          |
| diabetes, type 2; glucose tolerance                                                                         |

|                                                                          |
|--------------------------------------------------------------------------|
| diabetes, type 2; glucose tolerance; obesity                             |
| diabetes, type 2; glucose; HbA1c                                         |
| diabetes, type 2; hypertension                                           |
| diabetes, type 2; hypertension; insulin                                  |
| diabetes, type 2; hypertension; obesity, localized                       |
| diabetes, type 2; insulin                                                |
| diabetes, type 2; insulin; glucose; C-peptide; fatty acid                |
| diabetes, type 2; insulin; leptin                                        |
| diabetes, type 2; insulin; lipids; obesity                               |
| diabetes, type 2; insulin; obesity                                       |
| diabetes, type 2; metabolic syndrome                                     |
| diabetes, type 2; myocardial infarction                                  |
| diabetes, type 2; nephropathy                                            |
| diabetes, type 2; nephropathy in other diseases                          |
| diabetes, type 2; nephropathy, diabetic                                  |
| diabetes, type 2; obesity                                                |
| diabetes, type 2; polymetabolic syndrome                                 |
| diabetes, type 2; stroke, ischemic                                       |
| diabetes, type 2; weight loss; weight gain                               |
| diabetic nephropathy; retinopathy, diabetic                              |
| dietary intake and body composition                                      |
| drug genotoxicity                                                        |
| drug hypersensitivity                                                    |
| drug hypersensitivity; asthma; rhinosinuitis, allergic fungal; sinusitis |
| drug metabolism                                                          |
| dyslipidemia                                                             |
| dyslipidemia and insulin resistance                                      |
| dyslipidemias                                                            |
| electrolyte levels                                                       |
| elevated ACE                                                             |
| elevated fasting blood glucose levels                                    |
| elevated HDL cholesterol levels                                          |
| endogenous hypertriglyceridemia and familial hypercholesterolemia        |
| enzyme activity                                                          |
| exercise-mediated changes of insulin resistance                          |
| Fabry disease                                                            |
| familial combined hyperlipidaemia.                                       |
| familial combined hyperlipidemia                                         |
| familial defective apolipoprotein B                                      |
| familial defective apolipoprotein B-100 in a Chinese man                 |
| familial defective apolipoprotein B100.                                  |
| familial diabetes insipidus                                              |
| familial hypercholesterolaemia                                           |
| fasting total cholesterol and LDL-cholesterol concentrations only        |
| fibrinogen                                                               |
| fibrinogen; Budd-Chiari syndrome                                         |
| folate                                                                   |

|                                                                                                     |
|-----------------------------------------------------------------------------------------------------|
| folate homocysteine                                                                                 |
| folate homocysteine vitamin B12                                                                     |
| folate; homocystinuria                                                                              |
| G6PD deficiency                                                                                     |
| gallstone disease                                                                                   |
| gallstones                                                                                          |
| Gaucher disease                                                                                     |
| Gestational Diabetes                                                                                |
| gestational diabetes mellitus                                                                       |
| Gilbert syndrome                                                                                    |
| Gilbert's syndrome                                                                                  |
| glucocorticoid deficiency                                                                           |
| glucose                                                                                             |
| glucose insulin                                                                                     |
| glucose insulin obesity                                                                             |
| glucose intolerance                                                                                 |
| glucose metabolism                                                                                  |
| glucose response                                                                                    |
| glucose tolerance                                                                                   |
| glucose tolerance hyperglycemia                                                                     |
| glucose tolerance insulin                                                                           |
| glucose tolerance insulin lipemia lipid oxidation                                                   |
| glucose tolerance triglycerides                                                                     |
| glucose tolerance; fatty acid                                                                       |
| glucose tolerance; insulin                                                                          |
| glucose tolerance; insulin; body fat                                                                |
| glucose tolerance; insulin; obesity; energy expenditure                                             |
| glucose tolerance; insulin; polycystic ovary syndrome; androgen levels; anthropometric measurements |
| glucose tolerance; insulin; vascular disease                                                        |
| glucose tolerance; metabolic syndrome; adiponectin                                                  |
| glucose; adiponectin                                                                                |
| glucose; insulin secretion                                                                          |
| glucose; paraoxonase-1                                                                              |
| glutamic acid decarboxylase antibodies                                                              |
| glycogen storage disease                                                                            |
| gout                                                                                                |
| growth hormone concentrations insulin-like growth factor                                            |
| growth hormone responsiveness                                                                       |
| growth hormone secretion and height                                                                 |
| HDL cholesterol/ BMI                                                                                |
| HDL-cholesterol                                                                                     |
| HDL-cholesterol level                                                                               |
| Head and neck squamous cell cancer                                                                  |
| hemochromatosis                                                                                     |
| Hemoglobin Stanleyville II                                                                          |
| hemolytic uremic syndrome                                                                           |

|                                                                                                                      |
|----------------------------------------------------------------------------------------------------------------------|
| high and low levels of cholesterol                                                                                   |
| High Triglyceride/ Low HDL Cholesterol Levels                                                                        |
| high-density lipoprotein cholesterol level.                                                                          |
| higher body mass index                                                                                               |
| higher levels of serum leptin                                                                                        |
| hirsutism polycystic ovary syndrome                                                                                  |
| homocysteine                                                                                                         |
| homocysteine nitric oxide                                                                                            |
| homocysteine rheumatoid arthritis rheumatoid nodulosis                                                               |
| homocysteine; vitamin B12; holotranscobalamin; methylmalonic acid                                                    |
| homocystinuria                                                                                                       |
| homocysteine                                                                                                         |
| hormone disturbance                                                                                                  |
| hyperalphalipoproteinemia                                                                                            |
| hyperandrogenism                                                                                                     |
| hyperbilirubinemia                                                                                                   |
| hypercalciuria                                                                                                       |
| hypercholesterolemia                                                                                                 |
| hypercholesterolemia of hypothyroidism                                                                               |
| hypercholesterolemia; cholesterol, LDL                                                                               |
| hypercholesterolemia; hyperlipidemia; hypertriglyceridemia; dysbetalipoproteinemia                                   |
| hyperglycemia insulin                                                                                                |
| hyperhomocystinemia                                                                                                  |
| hyperinsulinemia; fat oxidation; intestinal fatty acid absorption                                                    |
| hyperlipidemia                                                                                                       |
| hyperparathyroidism                                                                                                  |
| hypertension                                                                                                         |
| hypertriglyceridemia                                                                                                 |
| hypertriglyceridemia and the development of fatty liver                                                              |
| hyperuricemia; uric acid                                                                                             |
| hypoglycemia                                                                                                         |
| hypogonadotropic hypogonadism                                                                                        |
| hypolactasia, adult-type                                                                                             |
| hypopituitarism midline neurological abnormalities optic nerve hypoplasia pituitary dysfunction septooptic dysplasia |
| hypospadias                                                                                                          |
| hypothyroidism                                                                                                       |
| hypothyroidism, congenital                                                                                           |
| idiopathic haemochromatosis                                                                                          |
| increased antilipolytic insulin sensitivity                                                                          |
| increased body weight and dyslipoproteinaemia involving triglyceride-rich lipoproteins                               |
| increased concentration of HDL-C and decreased promoter activity                                                     |
| increased fat oxidation and hyperinsulinemia                                                                         |
| increased fatty acid binding increased fat oxidation and insulin resistance                                          |
| Increased plasma concentrations of total cholesterol                                                                 |

|                                                                                             |
|---------------------------------------------------------------------------------------------|
| increased plasma leptin levels                                                              |
| increased plasma triglyceride and lower high-density lipoprotein cholesterol concentrations |
| increased plasma triglyceride levels                                                        |
| increased prevalence and level of insulin autoantibodies                                    |
| increased sensitivity to glucocorticoids                                                    |
| increased serum glucose concentrations                                                      |
| increased serum iron transferrin saturation and hemoglobin                                  |
| Inflammatory Bowel disease                                                                  |
| inflammatory bowel disease; bone density                                                    |
| insulin                                                                                     |
| Insulin in Obese Women with Impaired Glucose Tolerance (IGT)                                |
| insulin left ventricular mass                                                               |
| insulin obesity                                                                             |
| insulin resistance                                                                          |
| insulin resistance and intra-abdominal fat thickness                                        |
| insulin resistance in obesity                                                               |
| insulin resistance; fatty acid                                                              |
| insulin response to oral glucose                                                            |
| Insulin sensitivity                                                                         |
| insulin triglycerides                                                                       |
| insulin; glucose                                                                            |
| insulin; glucose; C-peptide; fatty acid                                                     |
| insulin; lipids; glucose                                                                    |
| insulin; lipids; obesity; glucose; leptin                                                   |
| insulin; lipids; obesity; glucose; leptin; cortisol                                         |
| insulin; lipoprotein; lipids                                                                |
| insulin; obesity                                                                            |
| insulin; obesity; blood pressure, arterial; blood and blood forming organ disorders         |
| insulin; obesity; leptin                                                                    |
| insulin-like growth factor                                                                  |
| insulin-resistance syndrome                                                                 |
| Insulin-resistant diabetes                                                                  |
| intima-media thickness; carotid plaque                                                      |
| iron levels                                                                                 |
| iron levels; soluble transferrin receptor; transferrin                                      |
| iron load                                                                                   |
| lactate dehydrogenase severe acute respiratory syndrome                                     |
| lactose intolerance                                                                         |
| LDL-cholesterol                                                                             |
| lead blood levels; zinc                                                                     |
| lead toxicity                                                                               |
| leanness obesity                                                                            |
| leisure physical activity                                                                   |
| leptin                                                                                      |
| leptin expression                                                                           |

|                                                             |
|-------------------------------------------------------------|
| leptin levels                                               |
| leptin; fat mass                                            |
| Lesch-Nyhan syndrome                                        |
| lipid levels                                                |
| lipid metabolism                                            |
| lipid metabolism disorders                                  |
| lipid metabolism disorders; hyperlipidemia                  |
| lipid metabolism disorders; metabolic syndrome              |
| lipid metabolism disorders; obesity                         |
| lipid profiles                                              |
| lipids                                                      |
| lipids; atherosclerosis                                     |
| lipids; C-reactive protein; obesity; glucose; leptin        |
| lipids; height                                              |
| lipids; obesity; glucose; cortisol                          |
| lipolysis                                                   |
| lipoprotein                                                 |
| lipoprotein level                                           |
| lipoprotein levels                                          |
| lipoprotein subclass profiles                               |
| lipoprotein(a) concentration                                |
| lipoprotein, LDL                                            |
| lipoprotein; lipids                                         |
| lipoproteins                                                |
| liver disease; Wilson disease                               |
| low bone-mineral density and rapid postmenopausal bone loss |
| low insulin and cholesterol levels                          |
| Lp(a)                                                       |
| Lp(a) levels                                                |
| mannose-binding lectin levels                               |
| mannose-binding lectin levels, serum                        |
| McArdle disease                                             |
| medium-chain acyl-CoA dehydrogenase (MCAD) deficiency       |
| medium-chain acyl-CoA dehydrogenase deficiency              |
| metabolic syndrome                                          |
| metabolic syndrome obesity                                  |
| metabolism disorders                                        |
| microalbuminuria                                            |
| mild familial hypercholesterolaemia                         |
| minimum lifetime body mass index                            |
| myeloperoxidase activity                                    |
| neonatal hyperbilirubinemia                                 |
| nephrolithiasis                                             |
| nephropathy                                                 |
| nephropathy in other diseases                               |
| nephropathy, diabetic                                       |

|                                                                                                |
|------------------------------------------------------------------------------------------------|
| nephropathy, diabetic; retinopathy, diabetic; neuropathy, diabetic; microalbuminuria, diabetic |
| nitric oxide                                                                                   |
| normal serum cholesterol levels                                                                |
| obesity                                                                                        |
| Obesity ????????                                                                               |
| Obesity and insulin response                                                                   |
| Obesity and Type 2 Diabetes                                                                    |
| Obesity- associated hypertension ????????                                                      |
| obesity PAI-1 levels                                                                           |
| obesity; affective disorder                                                                    |
| obesity; birth weight                                                                          |
| obesity; blood pressure, arterial                                                              |
| obesity; blood pressure, arterial; sleep apnea                                                 |
| obesity; cortisol                                                                              |
| obesity; depression; cerebrovascular disease                                                   |
| obesity; energy expenditure                                                                    |
| obesity; hyperandrogenism                                                                      |
| obesity; metabolic syndrome                                                                    |
| obesity; polycystic ovarian syndrome; hyperandrogenism                                         |
| ossification of the posterior longitudinal ligament                                            |
| ossification of the posterior longitudinal ligament of the spine                               |
| ossification of the posterior longitudinal ligament of the spine (OPLL)                        |
| osteoarthritis                                                                                 |
| osteonecrosis                                                                                  |
| osteopenia osteoporosis                                                                        |
| osteoporosis                                                                                   |
| osteoporosis, postmenopausal                                                                   |
| osteoporosis, postmenopausal; bone density                                                     |
| osteoporosis, postmenopausal; bone density; hormone disturbance                                |
| osteoporosis, postmenopausal; osteoporosis                                                     |
| osteoporosis; cirrhosis, primary biliary                                                       |
| oxidative stress                                                                               |
| PAH metabolites, urinary                                                                       |
| PAH-DNA adducts                                                                                |
| PAI-1 levels                                                                                   |
| pesticide toxicity                                                                             |
| phenylketonuria                                                                                |
| plasma cholesterol levels and body mass index                                                  |
| plasma endothelin-1 levels                                                                     |
| plasma factor VII activity and antigen levels                                                  |
| plasma fibrinogen levels                                                                       |
| plasma fibrinogen levels in smokers and non-smokers                                            |
| plasma glucose concentration                                                                   |
| plasma HDL-cholesterol                                                                         |
| plasma high density lipoprotein cholesterol and apolipoprotein AI                              |
| plasma high-density lipoprotein cholesterol levels                                             |



|                                                        |
|--------------------------------------------------------|
| plasma homocysteine levels                             |
| plasma levels of homocysteine                          |
| plasma lipid and apolipoprotein levels                 |
| Plasma Lipid Levels                                    |
| plasma lipid levels and body mass index                |
| plasma lipoprotein(a) levels                           |
| plasma lipoproteins                                    |
| plasma protein C levels                                |
| plasma protein C levels and thrombotic risk            |
| plasma total and LDL-apolipoprotein B                  |
| plasma vWF                                             |
| plasmatic PAI-1 activity                               |
| plasminogen activator; fibrinolytic activities         |
| platelet alpha2 beta1 density                          |
| polycystic ovarian disease                             |
| polycystic ovarian syndrome                            |
| polycystic ovarian syndrome; insulin resistance        |
| Polycystic ovaries and premature male pattern baldness |
| polycystic ovary syndrome                              |
| polycystic ovary syndrome.                             |
| polycystic ovary syndrome; adrenal androgen            |
| polycystic ovary syndrome; diabetes                    |
| polycystic ovary syndrome; pregnancy loss, recurrent   |
| Posttransplantation diabetes mellitus (PTDM)           |
| primary biliary cirrhosis]                             |
| primary hyperparathyroidism                            |
| prolactin                                              |
| reduced energy expenditure                             |
| reduced HDL cholesterol and LpA-I                      |
| retinopathy, diabetic                                  |
| schizophrenia                                          |
| serum androgen concentrations                          |
| serum cholesterol and LDL-cholesterol levels           |
| serum concentrations of creatinine                     |
| Serum Insulin Levels in obese                          |
| serum lipid levels                                     |
| serum low density lipoprotein                          |
| serum testosterone level                               |
| serum total and ionized calcium concentration          |
| serum triglyceride levels                              |
| sex hormones                                           |
| sex steroids                                           |
| sex-dependent growth                                   |
| sickle cell anemia                                     |
| sickle cell disease                                    |
| Sjogren-Larsson syndrome                               |
| skeletal responsiveness to estrogen                    |

|                                                     |
|-----------------------------------------------------|
| soluble cytotoxic T lymphocyte-associated antigen-4 |
| sulfotransferases enzyme activity                   |
| Tay-Sachs disease                                   |
| testosterone                                        |
| testosterone; prostate specific antigen             |
| thrombosis                                          |
| thyroid function                                    |
| total serum calcium                                 |
| triacylglycerol                                     |
| triglyceride levels                                 |
| triglycerides                                       |
| triglycerides; atherosclerosis, coronary            |
| triglycerides; cholesterol, LDL                     |
| triglycerides; cholesterol, LDL; hyperlipidemia     |
| triglycerides; cholesterol, VLDL                    |
| triglycerides; hypercholesterolemia                 |
| triglycerides; insulin                              |
| triglycerides; insulin; cardiovascular disease risk |
| triglycerides; insulin; obesity                     |
| triglycerides; obesity                              |
| tuberculosis                                        |
| Type 2 Diabetes Mellitus                            |
| Type 2 Diabetes (Retinopathy)                       |
| Type 2 diabetes                                     |
| Type II diabetic                                    |
| type III hyperlipoproteinemia                       |
| uric acid                                           |
| urinary calculus                                    |
| urinary PAH metabolites                             |
| urolithiasis                                        |
| variation in plasma lipoproteins                    |
| vasodilation                                        |
| very low bone mass                                  |
| waist circumference                                 |
| warfarin sensitivity                                |
| warfarin therapy, response to                       |
| weight gain                                         |
| weight gain (antipsychotic-drug induced)            |
| weight gain, antipsychotic drug-induced             |
| weight loss                                         |
| Wilson disease                                      |
|                                                     |
| age-related macular degeneration                    |
| ALS/amyotrophic lateral sclerosis                   |
| Alzheimer`s Disease                                 |
| Alzheimers disease                                  |

**NEUROLOGICAL**

|                                                                                                                             |
|-----------------------------------------------------------------------------------------------------------------------------|
| Alzheimer's Disease                                                                                                         |
| Alzheimer's disease cognitive function                                                                                      |
| Alzheimer's disease dementia                                                                                                |
| Alzheimer's disease dementia, vascular                                                                                      |
| Alzheimer's disease depressive disorder, major                                                                              |
| Alzheimer's disease Parkinson's disease                                                                                     |
| Alzheimer's Disease/Coronary artery disease                                                                                 |
| Alzheimer's disease; Abeta load in brain                                                                                    |
| Alzheimer's disease; aggressive behavior                                                                                    |
| Alzheimer's disease; anxiety disorder; depression; psychoses; aggressive behavior                                           |
| Alzheimer's disease; atherosclerosis, coronary                                                                              |
| Alzheimer's disease; attention deficit disorder; conduct disorder; oppositional defiant disorder; dementia, frontotemporal  |
| Alzheimer's disease; cognitive function                                                                                     |
| Alzheimer's disease; dementia                                                                                               |
| Alzheimer's disease; dementia, vascular                                                                                     |
| Alzheimer's disease; depressive disorder, major                                                                             |
| Alzheimer's disease; Parkinson's disease                                                                                    |
| Alzheimer's disease; Parkinson's disease; multiple system atrophy                                                           |
| Alzheimer's disease; Parkinson's disease; progressive supranuclear palsy; dementia, frontotemporal; multiple system atrophy |
| Alzheimer's disease; psychoses                                                                                              |
| Alzheimer's disease; psychosis                                                                                              |
| Alzheimer's disease; vascular endothelial growth factor levels                                                              |
| argyrophilic grain disease                                                                                                  |
| ataxia (SCA)                                                                                                                |
| brain activity                                                                                                              |
| brain electrical response                                                                                                   |
| brain receptor-binding characteristics                                                                                      |
| Charcot-Marie-Tooth disease                                                                                                 |
| Charcot-Marie-Tooth disease type 1A                                                                                         |
| Charcot-Marie-Tooth disease type 1B                                                                                         |
| Charcot-Marie-Tooth neuropathy type 1B                                                                                      |
| Charcot-Marie-Tooth type 1 disease                                                                                          |
| Charcot-Marie-Tooth type 1B                                                                                                 |
| chronic toxic encephalopathy                                                                                                |
| clinically distinct Charcot-Marie-Tooth phenotype                                                                           |
| cluster headache                                                                                                            |
| Creutzfeldt-Jakob disease                                                                                                   |
| delayed sleep phase syndrome                                                                                                |
| delayed sleep phase syndrome.                                                                                               |
| dementia                                                                                                                    |
| depression                                                                                                                  |
| dyslexia                                                                                                                    |
| dystonia                                                                                                                    |
| dystonia, cervical                                                                                                          |

|                                                           |
|-----------------------------------------------------------|
| encephalopathies, transmissible spongiform                |
| encephalopathy stroke                                     |
| epilepsy                                                  |
| epilepsy, temporal lobe                                   |
| epilepsy; seizures, febrile                               |
| epilpsy                                                   |
| essential tremor                                          |
| essential tremor Parkinson's disease                      |
| event-related prefrontal activity                         |
| familial Alzheimer's disease associated                   |
| familial amyloid polyneuropathy.                          |
| familial amyloidotic polyneuropathy.                      |
| familial amyotrophic lateral sclerosis                    |
| familial amyotrophic lateral sclerosis.                   |
| Familial atypical progressive supranuclear palsy          |
| frontotemporal dementia                                   |
| frontotemporal dementia and Pick-like 3R and 4R tauopathy |
| Guillain-Barre syndrome                                   |
| gyrate atrophy                                            |
| hippocampal volume                                        |
| Huntington disease                                        |
| Huntington's disease                                      |
| intelligence                                              |
| Jakob-Creutzfeldt disease                                 |
| Joubert syndrome                                          |
| Joubert syndrome nephronophthisis                         |
| late-onset Alzheimer's disease.                           |
| Lewy Body Formation                                       |
| memory disturbance                                        |
| memory impairment                                         |
| memory impairment, subjective                             |
| migraine                                                  |
| migraine migraine with aura                               |
| migraine risk                                             |
| migraine with aura                                        |
| motor neuron disease                                      |
| Multiple sclerosis                                        |
| narcolepsy                                                |
| neuropathy                                                |
| neuropathy, Alzheimer's disease related                   |
| neuropathy, diabetic                                      |
| neuropathy, non-arteritic ischaemic optic                 |
| P300 amplitudes                                           |
| pain response                                             |
| panencephalitis, subacute sclerosing                      |
| Parkinsons disease                                        |
| Parkinson's disease                                       |

## PHARMACOGENOMIC

|                                                                                                                       |
|-----------------------------------------------------------------------------------------------------------------------|
| Parkinson's disease; alcohol abuse                                                                                    |
| Parkinson's disease; cognition                                                                                        |
| Parkinson's disease; dementia in other conditions                                                                     |
| Parkinson's disease; depression                                                                                       |
| Parkinson's disease; hallucinations                                                                                   |
| photoparoxysmal response                                                                                              |
| prefrontal cortex function                                                                                            |
| prefrontal activity                                                                                                   |
| primary progressive aphasia                                                                                           |
| progressive supranuclear palsy                                                                                        |
| psychoses                                                                                                             |
| restless legs syndrome                                                                                                |
| schizophrenia                                                                                                         |
| seizures                                                                                                              |
| seizures, febrile                                                                                                     |
| sleep disorders                                                                                                       |
| spastic paraplegia                                                                                                    |
| spinocerebellar ataxia                                                                                                |
| spinocerebellar ataxia type 6                                                                                         |
| tardive dyskinesia                                                                                                    |
| vertigo, migraine-associated                                                                                          |
|                                                                                                                       |
| 11beta-hydroxylase activity                                                                                           |
| 18F-fluorodeoxyglucose uptake                                                                                         |
| 5-fluorouracil- related toxicity                                                                                      |
| 5-fluorouracil toxicity                                                                                               |
| 5-fluorouracil toxicity                                                                                               |
| ABT-773 plasma levels                                                                                                 |
| acenocoumarol pharmacokinetics                                                                                        |
| acenocoumarol response                                                                                                |
| acyl-mycophenolic acid-glucuronide                                                                                    |
| adverse neonatal outcomes birth weight neuromotor symptoms respiratory distress syndrome, neonatal                    |
| allergic reaction, betalactam                                                                                         |
| alprazolam pharmacokinetics                                                                                           |
| amlodipine pharmacokinetics                                                                                           |
| amphetamine response                                                                                                  |
| analgesic response                                                                                                    |
| anemia C-reactive protein                                                                                             |
| anesthesia effects diazepam pharmacokinetics                                                                          |
| anticoagulant complications; bleeding events, warfarin therapy-related; overanticoagulation, warfarin therapy-related |
| anticoagulant response of acenocoumarol                                                                               |
| antiemetic response                                                                                                   |
| anxiety disorder                                                                                                      |
| arsenic metabolism                                                                                                    |
| arsenic toxicity                                                                                                      |

|                                                                                        |
|----------------------------------------------------------------------------------------|
| asthma                                                                                 |
| atrasentan phamacokinetics                                                             |
| attention deficit hyperactivity disorder                                               |
| azathioprine adverse effects                                                           |
| azathioprine tolerance                                                                 |
| benzene toxicity                                                                       |
| bilirubin                                                                              |
| bleeding complications                                                                 |
| blood pressure, arterial                                                               |
| body mass                                                                              |
| body mass smoking behavior                                                             |
| breast cancer                                                                          |
| breast cancer neutropenia                                                              |
| carisoprodol metabolism                                                                |
| carvedilol pharmacokinetics                                                            |
| cervical cancer                                                                        |
| chemotherapy toxicity                                                                  |
| chlorpropamide pharmacokinetics                                                        |
| cholestasis, drug-induced hepatotoxicity                                               |
| cholesterol                                                                            |
| cholesterol cholesterol, HDL cholesterol, LDL hyperlipidemia lipoprotein triglycerides |
| cholesterol cholesterol, HDL cholesterol, LDL triglycerides                            |
| cholesterol glucose insulin triglycerides                                              |
| cholesterol height                                                                     |
| cholesterol, HDL cholesterol, LDL heart transplant                                     |
| cholesterol, HDL triglycerides                                                         |
| cholesterol, LDL                                                                       |
| citalopram adverse effects depressive disorder, major                                  |
| clomipramine metabolism                                                                |
| colon cancer                                                                           |
| colorectal cancer                                                                      |
| coumarin sensitivity                                                                   |
| C-reactive protein cardiovascular event lipids                                         |
| Crohn's disease                                                                        |
| Crohn's disease ulcerative colitis                                                     |
| cyclophosphamide bioactivation                                                         |
| cyclophosphamide phamacokinetics                                                       |
| cyclophosphamide pharmacokinetics                                                      |
| cyclosporine nephrotoxicity                                                            |
| cyclosporine pharmacokinetics                                                          |
| cyclosporine resistance                                                                |
| CYP2A6 phenotype                                                                       |
| depression                                                                             |
| depression sleep disorders                                                             |
| depressive disorder, major                                                             |
| diabetes, type 2                                                                       |

|                                                                |
|----------------------------------------------------------------|
| diabetes, type 2 insulin                                       |
| digoxin, serum concentration                                   |
| docetaxel pharmacokinetics                                     |
| docetaxel pharmacokinetics docetaxel toxicity                  |
| dyskinesias, levodopa-induced                                  |
| ebastine metabolism                                            |
| edema                                                          |
| efavirenz pharmacokinetics HIV                                 |
| efficacy and tolerability of simvastatin                       |
| epilepsy                                                       |
| epilepsy phenytoin levels                                      |
| esophagitis                                                    |
| extrapyramidal side effects                                    |
| fentanyl effects                                               |
| flubiprofen metabolism                                         |
| fluvoxamine pharmacokinetics                                   |
| gastrointestinal toxicity                                      |
| glibenclamide pharmacokinetics lornoxicam pharmacokinetics     |
| gliclazide pharmacokinetics                                    |
| glycoprotein IIb/IIIa receptor activation platelet aggregation |
| growth response to growth hormone therapy                      |
| H. pylori infection                                            |
| haloperidol, plasma                                            |
| head and neck cancer                                           |
| heart disease, ischemic hypercholesterolemia                   |
| hepatitis C, chronic                                           |
| hepatotoxicity leukopenia                                      |
| hepatotoxicity, diclofenac-induced                             |
| HIV                                                            |
| hypercholesterolemia                                           |
| hypertension                                                   |
| ibuprofen clearance                                            |
| indinavir pharmacokinetics                                     |
| indisulam pharmacokinetics                                     |
| irbesartan pharmacokinetics                                    |
| irinotecan pharmacokinetics                                    |
| irinotecan pharmacokinetics irinotecan toxicity lung cancer    |
| irinotecan pharmacokinetics lung cancer                        |
| irinotecan toxicity                                            |
| irritable bowel syndrome                                       |
| kidney cancer                                                  |
| kidney transplant; folate; homocysteine                        |
| lasoprazole pharmacokinetics                                   |
| latanoprost efficacy                                           |
| left ventricular ejection fraction                             |
| left ventricular fractional shortening                         |
| leukemia                                                       |

|                                                                                          |
|------------------------------------------------------------------------------------------|
| leukemia, myeloid                                                                        |
| lipids triglycerides                                                                     |
| liver injury, drug-induced                                                               |
| liver transplant                                                                         |
| loperamide concentration                                                                 |
| loratadine pharmacokinetics                                                              |
| lornoxicam pharmacokinetics                                                              |
| losartan oxidation                                                                       |
| lung cancer                                                                              |
| methadone levels                                                                         |
| methadone toxicity; etizolam pharmacokinetics                                            |
| methotrexate efficacy                                                                    |
| methotrexate toxicity                                                                    |
| multiple chemical sensitivity                                                            |
| multiple sclerosis                                                                       |
| mycophenolic acid pharmacokinetics                                                       |
| myocardial infarct                                                                       |
| nateglinide pharmacokinetics                                                             |
| neurobehavioral response                                                                 |
| nevaprine pharmacokinetics                                                               |
| nicotine                                                                                 |
| nicotine smoking behavior                                                                |
| obsessive compulsive disorder                                                            |
| omeprazole metabolism; sulfone metabolism                                                |
| omeprazole pharmacokinetics                                                              |
| organophosphate toxicity                                                                 |
| osteoporosis, postmenopausal                                                             |
| ovarian cancer                                                                           |
| ovarian toxicity                                                                         |
| ovarian toxicity, cyclophosphamide-related premature menopause, cyclophosphamide-related |
| paclitaxel pharmacokinetics                                                              |
| paclitaxel toxicity                                                                      |
| pain intensity                                                                           |
| pain response                                                                            |
| phenobarbital pharmacokinetics phenytoin pharmacokinetics                                |
| phenprocoumon requirements                                                               |
| phenytoin                                                                                |
| phenytoin levels                                                                         |
| phenytoin metabolism                                                                     |
| Plasma caffeine metabolite ratio                                                         |
| pravastatin kinetics                                                                     |
| pravastatin pharmacokinetics                                                             |
| psychosis, methamphetamine                                                               |
| QT intervals                                                                             |
| rabeprazole pharmacokinetics                                                             |
| rectal cancer                                                                            |



|                                                                               |
|-------------------------------------------------------------------------------|
| rheumatoid arthritis                                                          |
| rosiglitazone pharmacokinetics                                                |
| rosuvastatin pharmacokinetics                                                 |
| saquinavir pharmacokinetics                                                   |
| schizophrenia                                                                 |
| schizophrenia weight gain                                                     |
| selenium                                                                      |
| simvastatin pharmacokinetics                                                  |
| simvastatin treatment, efficacy and tolerability                              |
| sirolimus pharmacokinetics                                                    |
| smoking behavior                                                              |
| suicide                                                                       |
| sulfonylurea failure, secondary                                               |
| tacrolimus pharmacokinetics                                                   |
| tacrolimus pharmacokinetics                                                   |
| topiramate pharmacokinetics valproate pharmacokinetics                        |
| tuberculosis                                                                  |
| ulcerative colitis                                                            |
| verapamil pharmacokinetics                                                    |
| warfarin sensitivity                                                          |
| warfarin therapy                                                              |
| warfarin therapy, response to                                                 |
| weight gain                                                                   |
| weight gain, antipsychotic-induced                                            |
| weight loss                                                                   |
|                                                                               |
| <b>PSYCH</b>                                                                  |
| ADHD                                                                          |
| ADHD and conduct disorder                                                     |
| affective disorder                                                            |
| affective psychoses                                                           |
| Age-associated memory impairment                                              |
| aggression                                                                    |
| aggression, impulsivity, and central nervous system serotonergic responsivity |
| aggressive behavior                                                           |
| aggressive behavior of chondrosarcoma                                         |
| aggressive personality traits                                                 |
| alcohol abuse; behavior problems                                              |
| anger-related traits                                                          |
| anorexia nervosa                                                              |
| anorexia nervosa and food intake                                              |
| anorexia nervosa bulimia                                                      |
| anorexia nervosa obesity                                                      |
| anorexia nervosa; bulimia                                                     |
| anorexia nervosa; bulimia nervosa                                             |
| antidepressant medication intolerance.                                        |
| antisocial behavior conduct disorder                                          |

|                                                                                                     |
|-----------------------------------------------------------------------------------------------------|
| antisocial personality disorder                                                                     |
| anxiety                                                                                             |
| Anxiety and hostility and depression                                                                |
| anxiety depression neuroticism psychological distress                                               |
| anxiety disorder                                                                                    |
| anxiety disorder migraine                                                                           |
| anxiety disorder panic disorder                                                                     |
| anxiety disorder; alcohol abuse                                                                     |
| anxiety disorder; blood pressure, arterial; memory impairment                                       |
| anxiety disorder; depression                                                                        |
| anxiety disorder; depressive disorder, major; neuroticism                                           |
| anxiety disorder; depressive disorder, major; panic disorder                                        |
| anxiety disorders                                                                                   |
| anxiety symptoms                                                                                    |
| Anxiety traits                                                                                      |
| anxiety-related temperament and behavior problems                                                   |
| anxiety-related traits                                                                              |
| Asperger syndrome                                                                                   |
| attachment disorganization                                                                          |
| attention deficit disorder; seasonal affective disorder                                             |
| attention deficit hyperactivity disorder                                                            |
| attention deficit hyperactivity disorder behavior disorder                                          |
| attention deficit hyperactivity disorder conduct disorder novelty seeking substance experimentation |
| attention deficit hyperactivity disorder depressive disorder, major                                 |
| attention deficit hyperactivity disorder externalizing behavior IQ                                  |
| attention deficit hyperactivity disorder-like phenotype                                             |
| attention problems                                                                                  |
| attentional network function                                                                        |
| Attention-deficit/hyperactivity disorder                                                            |
| aura anxiety and depression                                                                         |
| autism                                                                                              |
| autism obsessive compulsive disorder                                                                |
| autism spectrum disorder                                                                            |
| behavior problems                                                                                   |
| behavioural traits                                                                                  |
| binge eating                                                                                        |
| bipolar affective disorder                                                                          |
| bipolar affective disorder.                                                                         |
| bipolar affective disorder; unipolar affective disorder                                             |
| bipolar and unipolar disorder                                                                       |
| bipolar disorder                                                                                    |
| bipolar disorder catatonia schizophrenia                                                            |
| bipolar disorder depression                                                                         |
| bipolar disorder depressive disorder, major                                                         |
| bipolar disorder mood disorder schizophrenia                                                        |
| bipolar disorder schizoaffective disorder                                                           |

|                                                                                  |
|----------------------------------------------------------------------------------|
| bipolar disorder schizophrenia                                                   |
| bipolar disorder suicide                                                         |
| bipolar disorder unipolar disorder                                               |
| bipolar disorder; affective psychoses                                            |
| bipolar disorder; mania, antidepressant-induced                                  |
| bipolar disorder; unipolar disorder                                              |
| bulimia                                                                          |
| bulimia eating disorder                                                          |
| bulimia harm avoidance personality traits                                        |
| caffeine-induced anxiety.                                                        |
| childhood-onset mood disorders                                                   |
| clozapine response                                                               |
| cognitive function                                                               |
| cognitive function dementia                                                      |
| cognitive function schizophrenia                                                 |
| cognitive function schizotypy                                                    |
| cognitive impairment                                                             |
| conduct disorder                                                                 |
| conduct disorder; oppositional defiant disorder; antisocial personality disorder |
| craving                                                                          |
| decision making                                                                  |
| decision-making memory impairment                                                |
| delusional disorder                                                              |
| delusions hallucinations psychoses                                               |
| dementia                                                                         |
| dementia, frontotemporal                                                         |
| dementia, vascular                                                               |
| depressed suicide                                                                |
| depression                                                                       |
| depression and response to antidepressant treatment                              |
| depression depressive disorder, major                                            |
| depression sleep disorders                                                       |
| depression stroke                                                                |
| depression, interferon-induced                                                   |
| depression, psychosis and antipsychotic response                                 |
| depression; thrombocyte MAO activity                                             |
| depressive disorder, major                                                       |
| depressive disorder, major hippocampal volume                                    |
| depressive disorder, major suicide                                               |
| depressive disorder, major; alcoholism                                           |
| depressive disorder, major; bipolar disorder                                     |
| depressive disorder, major; phobia                                               |
| depressive disorder, major; suicide                                              |
| depressive episode, major                                                        |
| disorganized attachment behavior                                                 |
| disruptive behavior                                                              |
| eating disorder                                                                  |

|                                                                   |
|-------------------------------------------------------------------|
| eating disorders                                                  |
| eating disorders mood disorders schizophrenia substance abuse     |
| externalizing behavior problems and associated temperament traits |
| externalizing behavior problems; hyperactivity                    |
| eye movement disturbances                                         |
| hallucinations schizophrenia                                      |
| harm avoidance                                                    |
| hypotension                                                       |
| impulse behavior                                                  |
| impulse control disorder                                          |
| impulsive behavior                                                |
| impulsive inpatients                                              |
| impulsivity                                                       |
| impulsivity; response inhibition                                  |
| intelligence                                                      |
| interpersonal sensitivity; paranoid ideation; psychoticism        |
| irritability hostility impulsivity and memory                     |
| major and bipolar depressives                                     |
| major depression                                                  |
| major depressive disorder                                         |
| major psychoses                                                   |
| manic-depressive illness                                          |
| memory                                                            |
| memory performance                                                |
| migrane. typical                                                  |
| mood disorder                                                     |
| mood disorder.                                                    |
| mood disorders                                                    |
| mood response                                                     |
| neuroticism                                                       |
| neuroticism; agreeableness                                        |
| novelty seeking                                                   |
| obsessive compulsive disorder                                     |
| obsessive compulsive disorder Tourette syndrome                   |
| obsessive-compulsive disorder                                     |
| panic disorder                                                    |
| pathologic gambling                                               |
| pathological gambling                                             |
| perceived parenting                                               |
| performance on the Wisconsin Card Sorting Test                    |
| personality disorders                                             |
| personality trait of spritual acceptance                          |
| personality traits                                                |
| personality traits; illegal drug use                              |
| posttraumatic stress disorder                                     |
| post-traumatic stress disorder                                    |
| psychiatric diseases                                              |

|                                                                                                     |
|-----------------------------------------------------------------------------------------------------|
| psychoses                                                                                           |
| psychoses schizophrenia                                                                             |
| psychoses; methamphetamine dependence                                                               |
| psychoses; neuroticism                                                                              |
| psychosis                                                                                           |
| psychosis schizophrenia                                                                             |
| psychosis, alcoholic                                                                                |
| psychotic disorders                                                                                 |
| reasoning skills                                                                                    |
| response to clozapine                                                                               |
| schizoaffective disorder; alcoholism; bipolar disorder; suicide                                     |
| schizophrenia                                                                                       |
| schizophrenia substance abuse                                                                       |
| schizophrenia tardive dyskinesia                                                                    |
| schizophrenia; alcohol abuse; depressive disorder, major; dermal erythema; schizoaffective disorder |
| schizophrenia; alcoholism; bipolar disorder                                                         |
| schizophrenia; bipolar disorder                                                                     |
| schizophrenia; bipolar disorder; psychoses                                                          |
| schizophrenia; body fat; weight gain                                                                |
| schizophrenia; depressive disorder, major; bipolar disorder; delusional disorder; psychosis         |
| schizophrenia; panic disorder                                                                       |
| schizophrenia; psychoses                                                                            |
| schizophrenia; schizoaffective disorder                                                             |
| schizophrenia; schizoaffective disorder; affective disorder                                         |
| schizophrenia; schizoaffective disorder; bipolar disorder                                           |
| schizophrenia; schizoaffective disorder; weight gain                                                |
| schizophrenia; tardive dyskinesia                                                                   |
| schizophrenia; therapeutic response                                                                 |
| schizotypal traits                                                                                  |
| seasonal affective disorder                                                                         |
| self-harm behavior                                                                                  |
| sleep disorders; depressive disorder, major                                                         |
| somatic anxiety                                                                                     |
| stress                                                                                              |
| suicidal behavior                                                                                   |
| suicidal behavior in depressed patients.                                                            |
| suicide                                                                                             |
| suicide family history                                                                              |
| suicide, alcohol-dependent                                                                          |
| suicide; depression                                                                                 |
| suicide; personality disorders                                                                      |
| tardive dyskinesia                                                                                  |
| temperament                                                                                         |
| tic disorder, chronic                                                                               |
| Tourette syndrome                                                                                   |

**RENAL**

vascular dementia  
violent suicidal behavior  
violent suicide  
acute and chronic kidney transplant outcome  
altered urinary albumin/creatinine values  
chronic renal failure  
chronic renal failure.  
diabetes, type 1 diabetic nephropathy  
diabetes, type 2  
diabetic nephropathy  
diabetic nephropathy and retinopathy.  
diabetic nephropathy diabetic neuropathy  
diabetic nephropathy.  
diabetic neuropathy  
diabetic polyneuropathy  
diabetic retinopathy  
Diabetic Retinopathy in Type 2 Diabetes  
diabetic retinopathy.  
end stage renal disease  
End- Stage Renal Disease (ESRD)  
Familial distal renal tubular acidosis  
glomerulonephritis  
glomerulopathy lupus nephritis  
glomerulosclerosis, focal  
Henoch-Schonlein purpura; nephritis, Henoch-Schonlein  
Human Renal Transplantation  
IgA nephropathy  
immunoglobulin A nephropathy  
kidney disease  
kidney disease; vascular disease  
kidney dysfunction  
kidney failure  
kidney failure, acute  
kidney failure, chronic  
kidney failure, chronic kidney transplant  
kidney size, newborn  
kidney stone disease  
kidney transplant  
kidney transplant rejection  
medullary sponge kidney disease  
minimal change nephrotic syndrome  
nephritis  
nephrogenic diabetes insipidus  
nephropathy  
nephropathy in diabetes mellitus

## REPRODUCTION

nephropathy in other diseases  
nephropathy in other diseases; cerebrovascular disease  
nephropathy in other diseases; peripheral vascular disease  
nephropathy, basement membrane  
nephropathy, diabetic  
nephropathy, diabetic; proteinuria  
nephropathy, IgA  
nephrosis  
nephrotic syndrome  
peritoneal transport  
polycystic kidney disease  
polycystic kidney disease 1  
progressive renal damage  
purpura, Henoch-Schonlein  
renal disease  
renal disease, end stage  
renal disease, end stage vascular endothelial growth factor  
renal scarring urinary tract infection  
renal transplant  
Renal Transplant Survival  
renin activity salt sensitivity  
retinopathy, diabetic

abruptio placentae  
adenomyosis endometriosis  
amenorrhea premature ovarian failure  
anovulation and fecundity  
azoospermia  
azoospermia infertility, male oligospermia  
azoospermia oligospermia  
azoospermia; oligospermia  
azoospermia; oligospermia; infertility, male  
birth weight  
birth weight fetal growth  
birth weight perinatal complications  
birth weight preterm delivery  
birth weight; cord blood IGF-II levels  
birth weight; placental weight  
birth weight; preterm delivery  
chorioamnionitis  
endometriosis  
endometriosis adenomyosis and leiomyomata.  
endometriosis.  
endometriosis; adenomyosis  
erectile dysfunction  
estradiol

|                                                                |
|----------------------------------------------------------------|
| fetal loss, early                                              |
| gestational age                                                |
| grow intrauterine growth                                       |
| GSTM1 methylation infertility, male                            |
| hyperglycemia hypertension, pregnancy induced preterm delivery |
| idiopathic recurrent miscarriage.                              |
| in vitro fertilization                                         |
| increased ovulation rate                                       |
| infant birthweight                                             |
| infant disorganization                                         |
| infertility, female                                            |
| infertility, male                                              |
| infertility, tubal factor                                      |
| intrahepatic cholestasis of pregnancy                          |
| intrauterine growth                                            |
| invitro fertilization                                          |
| male infertility                                               |
| menarche                                                       |
| menarche; menopause                                            |
| menopause                                                      |
| menstrual cycle                                                |
| menstrual disorders                                            |
| ovarian hyperstimulation syndrome                              |
| ovulatory dysfunctions                                         |
| placental abruption                                            |
| placental malperfusion pregnancy complications                 |
| preeclampsia                                                   |
| pre-eclampsia                                                  |
| preeclampsia.                                                  |
| preeclampsia; abruptio placentae                               |
| preeclampsia; eclampsia                                        |
| preeclampsia; hypertension, pregnancy induced                  |
| pregnancy loss                                                 |
| pregnancy loss, recurrent                                      |
| pregnancy loss, recurrent; coagulation disorder                |
| pregnancy loss, recurrent; fetal loss                          |
| pregnancy loss, recurrent; in vitro fertilization success      |
| premature ovarian failure                                      |
| premature ovarian failure primary amenorrhea                   |
| premature ovarian failure; menopause, early                    |
| premature pubarche                                             |
| premature rupture of membranes                                 |
| preterm birth                                                  |
| preterm delivery                                               |
| preterm delivery small-for-gestational age                     |
| shortened gestation                                            |
| spontaneous preterm birth                                      |



## VISION

|                                                                                  |
|----------------------------------------------------------------------------------|
| spontaneous preterm delivery.                                                    |
| Adult vitelliform macular dystrophy                                              |
| advanced retinopathy of prematurity                                              |
| albuminuria retinopathy, diabetic                                                |
| amyloidotic vitreous opacities Asparagine for isoleucine at position 84          |
| atopic dermatitis, ocular                                                        |
| Autosomal-dominant retinitis pigmentosa                                          |
| cataract glaucoma retinal detachment visual acuity Vogt-Koyanagi-Harada syndrome |
| cataract, presenile                                                              |
| choroidal neovascularization geographic atrophy macular degeneration             |
| cone degeneration                                                                |
| cone-rod dystrophy                                                               |
| cone-rod dystrophy macular dystrophy retinitis pigmentosa                        |
| congenital cataracts                                                             |
| Defective colour vision                                                          |
| diabetes, type 2; retinopathy, diabetic                                          |
| glaucoma                                                                         |
| glaucoma, normal tension                                                         |
| glaucoma, primary congenital                                                     |
| glaucoma, primary open-angle                                                     |
| glaucoma, primary open-angle ocular hypertension                                 |
| glaucoma, primary open-angle; glaucoma, normal tension                           |
| glaucoma; glaucoma, primary open-angle                                           |
| Graves' disease ophthalmology                                                    |
| Graves ophthalmology Graves' disease                                             |
| intraocular pressure                                                             |
| macular and peripheral retinal degeneration                                      |
| macular corneal dystrophy                                                        |
| macular corneal dystrophy.                                                       |
| macular degeneration                                                             |
| macular degeneration, age-related                                                |
| myopia                                                                           |
| normal tension glaucoma                                                          |
| ocular albinism                                                                  |
| ocular cicatricial pemphigoid                                                    |
| optic atrophy                                                                    |
| optic disc atrophy                                                               |
| pathological myopia                                                              |
| pattern dystrophy of the retina                                                  |
| Peters' anomaly                                                                  |
| primary open-angle glaucoma                                                      |
| proliferative vitreoretinopathy rhegmatogenous retinal detachment                |
| retinal artery occlusion                                                         |
| retinal hemangioblastomas                                                        |
| retinal vascular occlusion                                                       |

|                                 |
|---------------------------------|
| retinitis pigmentosa            |
| retinoblastoma                  |
| retinopathy of prematurity      |
| retinopathy, diabetic           |
| retinoschisis, x-linked         |
| Usher syndrome                  |
| X linked juvenile retinoschisis |
| young-onset keratoconus         |
| zonular pulverulent cataract    |
